# Supplementary material for: Cohort profile: gastric cancer in the population-based, Finnish National Esophago-Gastric Cancer Cohort (FINEGO) Study
Source: PubMed Central journal article supplement — BMJ Open. 2020 Oct 16;10(10):e039574. doi: 10.1136/bmjopen-2020-039574 (PMC7569918; doi:10.1136/bmjopen-2020-039574), 2020-10-16
Supplement: bmjopen-2020-039574.draft_revisions.pdf [file bmjopen-2020-039574.draft_revisions.pdf]

# BMJ Open

BMJ Open is committed to open peer review. As part of this commitment we make the peer review history of every article we publish publicly available.

When an article is published we post the peer reviewers' comments and the authors' responses online. We also post the versions of the paper that were used during peer review. These are the versions that the peer review comments apply to.

The versions of the paper that follow are the versions that were submitted during the peer review process. They are not the versions of record or the final published versions. They should not be cited or distributed as the published version of this manuscript.

BMJ Open is an open access journal and the full, final, typeset and author-corrected version of record of the manuscript is available on our site with no access controls, subscription charges or pay-per-view fees (<http://bmjopen.bmj.com>).

If you have any questions on BMJ Open's open peer review process please email [info.bmjopen@bmj.com](mailto:info.bmjopen@bmj.com)

# BMJ Open

## Cohort Profile: gastric cancer in the population-based, Finnish National Esophago-Gastric Cancer Cohort (FINEGO) study.

|                               |                                                                                                                                                                                                                                                                                                                                                                                                                                                                                                                                                                                                                                                                                                                                                                                                                                                                                                                                                                                                                                                                                                                                                                                                                                                                                                                                                                                                                                                                                                                                                                                                 |
|-------------------------------|-------------------------------------------------------------------------------------------------------------------------------------------------------------------------------------------------------------------------------------------------------------------------------------------------------------------------------------------------------------------------------------------------------------------------------------------------------------------------------------------------------------------------------------------------------------------------------------------------------------------------------------------------------------------------------------------------------------------------------------------------------------------------------------------------------------------------------------------------------------------------------------------------------------------------------------------------------------------------------------------------------------------------------------------------------------------------------------------------------------------------------------------------------------------------------------------------------------------------------------------------------------------------------------------------------------------------------------------------------------------------------------------------------------------------------------------------------------------------------------------------------------------------------------------------------------------------------------------------|
| Journal:                      | <i>BMJ Open</i>                                                                                                                                                                                                                                                                                                                                                                                                                                                                                                                                                                                                                                                                                                                                                                                                                                                                                                                                                                                                                                                                                                                                                                                                                                                                                                                                                                                                                                                                                                                                                                                 |
| Manuscript ID                 | bmjopen-2020-039574                                                                                                                                                                                                                                                                                                                                                                                                                                                                                                                                                                                                                                                                                                                                                                                                                                                                                                                                                                                                                                                                                                                                                                                                                                                                                                                                                                                                                                                                                                                                                                             |
| Article Type:                 | Cohort profile                                                                                                                                                                                                                                                                                                                                                                                                                                                                                                                                                                                                                                                                                                                                                                                                                                                                                                                                                                                                                                                                                                                                                                                                                                                                                                                                                                                                                                                                                                                                                                                  |
| Date Submitted by the Author: | 22-Apr-2020                                                                                                                                                                                                                                                                                                                                                                                                                                                                                                                                                                                                                                                                                                                                                                                                                                                                                                                                                                                                                                                                                                                                                                                                                                                                                                                                                                                                                                                                                                                                                                                     |
| Complete List of Authors:     | <p>Kauppila, Joonas; Karolinska Institutet Department of Molecular Medicine and Surgery, ; Oulun Yliopisto Laaketieteellisen tiedekunta, Cancer and Translational Medicine Research Unit<br/> Ohtonen, Pasi; Pohjois-Pohjanmaan Sairaanhoidopiiri, Department of Surgery<br/> Rantanen, Tuomo; Kuopion yliopistollinen sairaala, Department of Surgery; Etelä-Pohjanmaan keskussairaala, Department of Surgery<br/> Tyrväinen, Tuula; Tampereen yliopistollinen sairaala, Department of Gastroenterology and Alimentary Tract Surgery<br/> Toikkanen, Vesa; Tampereen yliopistollinen sairaala, Department of Cardiothoracic Surgery, Heart Center<br/> Pääaho, Minna; Oulun Yliopisto Laaketieteellisen tiedekunta, Surgery Research Unit<br/> Valtola, Antti; Kuopion yliopistollinen sairaala, Department of Surgery<br/> Räsänen, Jari; Helsingin ja Uudenmaan sairaanhoidopiiri, Department of General Thoracic and Oesophageal Surgery<br/> Kallio, Raija; Oulun Yliopisto Laaketieteellisen tiedekunta, Department of Oncology<br/> Sihvo, Eero; Keski Suomen Sairaanhoidopiiri, Department of Surgery<br/> Saarnio, Juha; Pohjois-Pohjanmaan Sairaanhoidopiiri, Department of Surgery<br/> Karttunen, Tuomo; Oulu University Hospital and University of Oulu, Medical Research Center<br/> Pohjanen, Vesa-Matti<br/> Ristimäki, Ari; Helsingin ja Uudenmaan sairaanhoidopiiri, Department of Pathology<br/> Laine, Simo; Varsinais-Suomen Sairaanhoidopiirin Kuntayhtymä, Department of Surgery<br/> Kokkola, Arto; Helsingin ja Uudenmaan sairaanhoidopiiri, Department of Surgery</p> |
| Keywords:                     | SURGERY, Gastrointestinal tumours < ONCOLOGY, Gastrointestinal tumours < GASTROENTEROLOGY, GASTROENTEROLOGY, Adult oncology < ONCOLOGY                                                                                                                                                                                                                                                                                                                                                                                                                                                                                                                                                                                                                                                                                                                                                                                                                                                                                                                                                                                                                                                                                                                                                                                                                                                                                                                                                                                                                                                          |
|                               |                                                                                                                                                                                                                                                                                                                                                                                                                                                                                                                                                                                                                                                                                                                                                                                                                                                                                                                                                                                                                                                                                                                                                                                                                                                                                                                                                                                                                                                                                                                                                                                                 |

1  
2  
3  
4  
5  
6  
7  
8  
9  
10  
11  
12  
13  
14  
15  
16  
17  
18  
19  
20  
21  
22  
23  
24  
25  
26  
27  
28  
29  
30  
31  
32  
33  
34  
35  
36  
37  
38  
39  
40  
41  
42  
43  
44  
45  
46  
47  
48  
49  
50  
51  
52  
53  
54  
55  
56  
57  
58  
59  
60

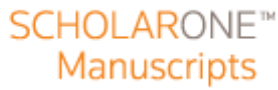

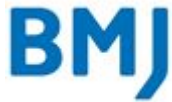

I, the Submitting Author has the right to grant and does grant on behalf of all authors of the Work (as defined in the below author licence), an exclusive licence and/or a non-exclusive licence for contributions from authors who are: i) UK Crown employees; ii) where BMJ has agreed a CC-BY licence shall apply, and/or iii) in accordance with the terms applicable for US Federal Government officers or employees acting as part of their official duties; on a worldwide, perpetual, irrevocable, royalty-free basis to BMJ Publishing Group Ltd ("BMJ") its licensees and where the relevant Journal is co-owned by BMJ to the co-owners of the Journal, to publish the Work in this journal and any other BMJ products and to exploit all rights, as set out in our [licence](#).

The Submitting Author accepts and understands that any supply made under these terms is made by BMJ to the Submitting Author unless you are acting as an employee on behalf of your employer or a postgraduate student of an affiliated institution which is paying any applicable article publishing charge ("APC") for Open Access articles. Where the Submitting Author wishes to make the Work available on an Open Access basis (and intends to pay the relevant APC), the terms of reuse of such Open Access shall be governed by a Creative Commons licence – details of these licences and which [Creative Commons](#) licence will apply to this Work are set out in our licence referred to above.

Other than as permitted in any relevant BMJ Author's Self Archiving Policies, I confirm this Work has not been accepted for publication elsewhere, is not being considered for publication elsewhere and does not duplicate material already published. I confirm all authors consent to publication of this Work and authorise the granting of this licence.

1  
2  
3 **Cohort Profile: gastric cancer in the population-based, Finnish National**  
4  
5  
6 **Esophago-Gastric Cancer Cohort (FINEGO) study**  
7  
8  
9  
10  
11

12 **Authors:** Joonas H. Kauppila<sup>1,2</sup>, Pasi Ohtonen<sup>1</sup>, Tuomo Rantanen<sup>3</sup>, Tuula Tyrväinen<sup>4</sup>, Vesa  
13 Toikkanen<sup>5</sup>, Minna Pääaho<sup>1</sup>, Antti Valtola<sup>3</sup>, Jari V. Räsänen<sup>6</sup>, Raija Kallio<sup>7</sup>, Eero Sihvo<sup>8</sup>, Juha  
14 Saarnio<sup>1</sup>, Tuomo J. Karttunen<sup>9</sup>, Vesa-Matti Pohjanen<sup>9</sup>, Ari Ristimäki<sup>10</sup>, Simo Laine<sup>11</sup>, Arto  
15 Kokkola<sup>12</sup>  
16  
17  
18  
19  
20  
21  
22  
23  
24  
25

26 **Affiliations:**

27  
28 <sup>1</sup>Surgery Research Unit, Medical Research Center Oulu, Oulu University Hospital and  
29 University of Oulu, Oulu, Finland;  
30  
31

32 <sup>2</sup>Upper Gastrointestinal Surgery, Department of Molecular Medicine and Surgery, Karolinska  
33 Institutet and Karolinska University Hospital, Stockholm, Sweden;  
34  
35

36  
37 <sup>3</sup>Department of Surgery, University of Eastern Finland and Kuopio University Hospital,  
38 Finland;  
39  
40

41 <sup>4</sup>Department of Gastroenterology and Alimentary Tract Surgery, Tampere University  
42 Hospital, Tampere, Finland;  
43  
44

45 <sup>5</sup>Department of Cardiothoracic Surgery, Heart Center, Tampere University Hospital and  
46 University of Tampere, Tampere, Finland;  
47  
48

49 <sup>6</sup>Department of General Thoracic and Oesophageal Surgery, Heart and Lung Centre,  
50 University of Helsinki and Helsinki University Hospital, Helsinki, Finland;  
51  
52

53 <sup>7</sup>Department of Oncology and Haematology, Oulu University Hospital, Oulu, Finland;  
54  
55

56 <sup>8</sup>Department of Surgery, Central Finland Central Hospital, Jyväskylä, Finland;  
57  
58

59 <sup>9</sup>Cancer and Translational Medicine Research Unit, Medical Research Center, University of  
60

1  
2  
3 Oulu and Oulu University Hospital, Oulu, Finland;  
4

5 <sup>10</sup>Department of Pathology, HUSLAB, and Applied Tumor Genomics Research Program,  
6  
7 Research Programs Unit, University of Helsinki and Helsinki University Hospital , Helsinki ,  
8  
9 Finland;  
10  
11

12 <sup>11</sup>The Division of Digestive Surgery and Urology, Turku University Hospital, Turku, Finland;  
13  
14 and  
15

16 <sup>12</sup>Department of Surgery, University of Helsinki and Helsinki University Hospital, Helsinki,  
17  
18 Finland.  
19  
20

21  
22  
23  
24  
25 **Corresponding author:** Joonas H. Kauppila, Surgery Research Unit, MRC Oulu, Oulu  
26  
27 University Hospital and University of Oulu, P.O. Box 5000, 90014 Oulu, Finland and Upper  
28  
29 Gastrointestinal Surgery, Department of Molecular Medicine and Surgery, Karolinska  
30  
31 Institutet and Karolinska University Hospital, Stockholm, Sweden. Email:  
32  
33

34 [Joonas.kauppila@oulu.fi](mailto:Joonas.kauppila@oulu.fi)  
35  
36  
37  
38  
39  
40

41 **Word count: 2757**  
42  
43  
44  
45  
46  
47  
48  
49  
50  
51  
52  
53  
54  
55  
56  
57  
58  
59  
60

## Abstract

### Purpose

The Finnish National Esophago-Gastric Cancer Cohort (FINEGO) was established with the aim of identifying factors that could contribute to improved outcomes in oesophago-gastric cancer.

### Participants

A total of 10,457 patients with gastric cancer or tumour diagnosis in the Finnish Cancer Registry or the Finnish Patient Registry during 1987-2016 were included in the cohort, with follow-up from Causes of Death registry until December 31<sup>st</sup>, 2016. All of the participants were at least 18 years of age, and had undergone either resectional or endoscopic mucosal surgery with curative or palliative intent.

### Findings to date

Of the 10,457 patients, 90.1% were identified to have cancer in both cancer and patient registries. In all, the median age was 70 at the time of surgery, 54.5% of the patients were male and 64.4% had no comorbidities. Education data was available for 31.1% of the patients, of whom the majority had had <12 years of formal education. Of the 7,798 with cancer staging data available, 41.1% had a local cancer. Adenocarcinoma was the most common (94.2%) histological type. Almost all patients underwent open gastrectomy and 214% in hospitals with annual volume of more than 30 gastrectomies per year. A total of 8,561 mortalities occurred during the study period, of which 6,474 were due to oesophago-gastric cancers. The 5-year survival was 34.6% and 5-year cancer-specific survival was 39.7%.

### Future plans

1  
2  
3 The data in FINEGO can be currently used for registry-based research but is being expanded  
4  
5 by data extraction from patient records and scanning of histological samples from the Finnish  
6  
7 biobanks. Initially, we are planning on studies on the national trends in treatment and  
8  
9 mortality, and studies on the demographic factors and their influence on survival.  
10  
11  
12  
13  
14  
15  
16  
17  
18  
19  
20  
21  
22  
23  
24  
25  
26  
27  
28  
29  
30  
31  
32  
33  
34  
35  
36  
37  
38  
39  
40  
41  
42  
43  
44  
45  
46  
47  
48  
49  
50  
51  
52  
53  
54  
55  
56  
57  
58  
59  
60

For peer review only



## Article Summary

### Strengths and limitations of this study:

- The main strength of the study is the population-based design with complete and accurate ascertainment of all patients diagnosed with gastric cancer in Finland, counteracting selection bias.
- The follow-up of participants is virtually complete.
- The main limitations are the exclusion of patients not undergoing surgery and registry information lag of up to two years.
- Some registry-based variables, such as laparoscopic surgery or neoadjuvant therapy are of questionable quality and should be interpreted cautiously before validation studies.
- The dataset will be complemented with patient records and histological slides collection to allow a wide variety of research questions.

**Funding statement:** This work is supported by research grants from the Sigrid Jusélius Foundation (Sigrid Juséliuksen Säätiö), The Finnish Cancer Foundation (Syöpäsäätiö), Päivikki and Sakari Sohlberg Foundation and Orion Research Foundation (Orionin Tutkimussäätiö). The funding sources have no role in the design and conduct of the study; collection, management, analysis, and interpretation of the data; preparation, review, or approval of the manuscript; or decision to submit the study protocol for publication.

**Competing interests statement:** The authors state no potential competing interests.

**Author contributions:**

Study idea: JHK; Concept and design: JHK, PO, TR, TT, VT, MP, AV, JVR, RK, JS, ES, TJK, VMP, AR, SL, AK; Data collection tools development: JHK, PO, TR, MP, JVR, ES, TJK, VMP, SL, AK; Obtained permissions: JHK, MP; Obtained funding: JHK; Statistical analysis: JHK, PO; Interpretation: JHK, PO, TR, TT, VT, MP, AV, JVR, RK, JS, ES, TJK, VMP, AR, SL, AK; Drafted the manuscript: JHK; Critical revision for intellectual content and accepted submitted version JHK, PO, TR, TT, VT, MP, AV, JVR, RK, JS, ES, TJK, VMP, AR, SL, AK; Guarantor: JHK.

**Data sharing statement:**

All data from FINEGO presented in this article are stored by the research group on safe servers at University of Oulu, Finland, and handled confidentially. Currently, only the research team has access to the data. Researchers interested in collaboration, for example joint efforts combining the dataset with other population-based studies, are welcome to contact the principal investigator Joonas Kauppila (joonas.kauppila@oulu.fi), or one of the local PIs (co-authors).

## Introduction

Gastric cancer is the third leading cause of cancer death worldwide.<sup>1</sup> Gastric cancer incidence is slowly decreasing,<sup>2</sup> also in Finland (Figure 1),<sup>3</sup> but the incident cancers are often diagnosed at a late stage.<sup>4</sup> The dominant histologic type is adenocarcinoma, and only less than 5% of all gastric cancers represent other histological types.<sup>5</sup> The standard treatment of gastric cancer is surgery, in certain stages accompanied by neoadjuvant or perioperative therapy.<sup>4,6</sup> Even after curative surgery, gastric cancers have poor survival.<sup>4,7</sup>

However, there are many unclear topics and gaps of knowledge in the treatment of gastric cancer, such as whether high hospital or surgeon volumes, or oncologic treatment improve gastric cancer survival,<sup>8</sup> whether certain anastomotic techniques are associated with less postoperative complications,<sup>9,10</sup> and whether Siewert II gastric cardia cancer should be resected by oesophagectomy or gastrectomy,<sup>11</sup> to name a few. The population-based nationwide cohort would be the ideal study design to evaluate these questions,<sup>12</sup> as randomized controls would be either unfeasible, or would need to include a very large amount of patients.

The Finnish registry data is known to be of high quality with high completeness.<sup>13</sup> To facilitate surgical research with appropriate in-depth clinical variables, we started a national collaborative with the aim to create a population-based cohort on gastric cancer in Finland with extensive data collection from the nationwide registries and patient records. The collaborative and the cohort was named The Finnish National Esophago-Gastric Cancer Cohort (FINEGO).<sup>14</sup>

In this cohort profile, we describe the registry data on 10,457 gastric cancer patients included in FINEGO.

## Cohort description

FINEGO is a population-based, nationwide, retrospective cohort study of all surgically treated esophageal and gastric cancer patients in Finland since 1987. Senior surgeons, oncologists, pathologists and statisticians are involved in the collaborative group, representing the six Finnish hospitals and the related universities actively participating in surgical treatment and research of esophago-gastric cancer.

The inclusion criteria of the study were:

- Age at least 18 years at the time of cancer diagnosis
- Primary cancer of epithelial origin in the oesophagus, cardia, or stomach
- Surgical treatment given for cancer, including all types of surgery or endoscopic resection

However, as there is a possibility of misclassification in the registries, the data collection was somewhat broader. All cancers of any origin were included during the registry data collection to avoid excluding misclassified patients. Furthermore, patients with unclear tumor diagnoses undergoing surgical resection were also included to reduce selection bias.

### Data sources

The data were collected from the Finnish Cancer Registry, Finnish Patient Registry and Statistics Finland. The immutable, 11-digit personal identification number assigned to each resident in the country was used to combine the registry data.<sup>15</sup> Personal identity number contains information on date of birth and sex, and was used to derive age information.

1  
2  
3 *The Finnish Cancer Registry* provided data on incident cancers, including topography or  
4 cancer location, histology, cancer stage (local, locally advanced, advanced), and whether  
5 chemotherapy, radiotherapy, or surgical treatment was given.  
6  
7  
8  
9

10 *The Finnish Patient Registry* has data on admission and discharge dates, operations codes,  
11 diagnosis codes and the hospital or healthcare unit where the treatment was given. These data  
12 were used to identify incident cancers and patients receiving surgical treatment, as well as for  
13 calculating comorbidities and annual hospital volume of gastric cancer surgery. Comorbidities  
14 were defined using the well-validated Charlson Comorbidity Index (CCI) not including  
15 gastric cancer, by retrieving diagnoses before index admission for surgery.<sup>16</sup> Neoadjuvant  
16 therapy codes were used to find patients undergoing neoadjuvant or perioperative treatment.  
17  
18 The annual hospital volume was assessed by calculating the number of benign and malignant  
19 gastrectomies during the year of surgery in the hospital the patient was operated in.  
20  
21  
22  
23  
24  
25  
26  
27  
28  
29  
30  
31

32 *Statistics Finland* provided data on the dates and causes of death, as well as highest education  
33 obtained by the patients.  
34  
35  
36  
37  
38  
39  
40

41 Incident cancers were identified using both cancer registry records and patient registry, using  
42 the relevant topographic in the cancer registry, and ICD-9 and ICD-10 codes in the patient  
43 registry.<sup>14</sup> Surgical codes concerning gastrectomy or endoscopic mucosal surgery were then  
44 searched in the *Patient Registry* to identify patients undergoing surgical treatment.<sup>14</sup>  
45  
46  
47  
48  
49  
50  
51  
52  
53

#### 54 Statistics

55  
56  
57  
58  
59  
60

1  
2  
3 The demographic factors were tabulated and Kaplan-Meier curves were calculated according  
4 to the life table method.<sup>17</sup> The endpoints were all-cause mortality and cancer-specific  
5 mortality, defined as mortality for esophago-gastric cancers to reduce misclassification bias.  
6  
7  
8  
9

#### 10 11 12 13 14 Permissions and registration

15  
16  
17 The study has been approved by ethical committee in Northern Ostrobothnia (EETMK  
18 115/2016), The National Institute for Health and Welfare (THL/169/5.05.00), Statistics  
19 Finland (TK-53-1478-17) and the Office of the Data Protection Ombudsman (Dnro  
20 506/402/17), Finland. Relevant local permissions and registrations were obtained from all the  
21 21 hospital districts. Individual informed consent will not be sought from the patients whose  
22 data are used in this observational study. Obtaining the informed consent has been waived by  
23 the Finnish law. The study will be conducted in accordance with the Declaration of Helsinki.  
24  
25  
26  
27  
28  
29  
30  
31  
32  
33  
34  
35  
36

#### 37 Patient and public involvement

38  
39  
40 Patients or public were not involved in the development of the research question and study  
41 design or conducting the present study.  
42  
43  
44  
45  
46  
47  
48  
49  
50  
51  
52  
53  
54  
55  
56  
57  
58  
59  
60

## Findings to date

A total of 10,457 patients were surgically treated for gastric cancer in Finland during years 1987-2016. This is almost 40% more than the initial estimate of 7,500 patients.<sup>14</sup> As seen in Figure 2, majority of the patients were operated during the first half of the study period, beginning with almost 600 operated gastric cancer patients in 1987 and linearly declining to less than 200 patients in the whole country in 2016. According to the official statistics, also the number of incident gastric cancer cases and deaths decreased during the study period (Figure 1).<sup>3</sup>

The vast majority of patients (90.1%) were identified to have cancer in both patient and cancer registry, while 7.4% had cancer or unclear tumor diagnosis in the patient registry only, and 2.5% had cancer diagnosis in the cancer registry only (Table 1).

Table 2 summarizes the demographic variables of the patients. The median age at the time of operation during the whole study period was 70.0 years, and remained quite constant over time (Figure 3). The proportion of males was 54.5% (n=5,695). Education data was lacking in 68.9% (7,207) of the patients, and of those with data available, the majority had less than 12 years of formal education. Most of the patients had CCI of 0 at the time of operation (n=6,731, 64.6%), while 2,408 (23.0%) had CCI of 1 and 1,318 (12.6%) had CCI of 2 or more.

Cancer staging was available for 7,798 (74.6%) patients. Of these 7,798 patients, 41.1% had local cancer, 27.5% had locally advanced cancer, and 31.3% had advanced cancer according to the cancer registry. Histology was available for 9,713 patients, of whom the majority had adenocarcinoma (94.2%).

1  
2  
3 The details on treatment are summarized in Table 3. The absolute majority underwent  
4  
5  
6  
7  
8  
9  
10  
11  
12  
13  
14  
15  
16  
17  
18  
19  
20  
21  
22  
23  
24  
25  
26  
27  
28  
29  
30  
31  
32  
33  
34  
35  
36  
37  
38  
39  
40  
41  
42  
43  
44  
45  
46  
47  
48  
49  
50  
51  
52  
53  
54  
55  
56  
57  
58  
59  
60  
The details on treatment are summarized in Table 3. The absolute majority underwent  
gastrectomy (n=10,140, 97.0%), followed by esophagectomy, combined  
esophagogastrectomy, and EMR or ESD, respectively. Minimally invasive (laparoscopic)  
approach was used in only 113 patients. Neoadjuvant or perioperative treatment was given to  
1,209 (11.6%) patients, with chemotherapy alone being the most common modality. The use  
of neoadjuvant or perioperative treatment increased from 8.3% in 1987-2006 to 24.6% in  
2007-2016.

Median annual hospital volume only decreased over time from over 20 gastrectomies per year  
to around 15 gastrectomies per year during the study period (Figure 3), despite the strong  
decrease in the total number of gastrectomies in the country (Figure 2). Of all patients, 2,602  
(24.9%) were operated in hospitals performing 1 to 10 gastrectomies per year, and 2,236  
(21.4%) in hospitals performing 31 to 81 gastrectomies per year (Table 3).

There were 8,561 mortalities during the study period, of which 6,474 were due to oesophago-  
gastric cancer according to the causes of death registry. Of the 10,457 patients, 67.9% were  
alive at 1 year after surgery, 43.3 were alive at 3 years after surgery, 34.6% were alive at 5  
years after surgery, and 24.1% at 10 years after surgery (Figure 4). For cancer-specific  
survival, the respective figures were 69.7% at 1 year after surgery, 46.8 at 3 years after  
surgery, 39.7% were alive at 5 years after surgery, and 34.5% at 10 years after surgery (Figure  
5).

### Future plans

In its present form, the FINEGO cohort can be used for conducting epidemiological research  
including the above clinical variables. The future studies using this data include a study on the  
trends of gastric cancer over time in Finland, as well as examining the influence of age, sex,



1  
2  
3 and comorbidities on the mortality of gastric cancer patients. Annual hospital volume in  
4  
5 relation to short- and long-term mortality will also be assessed.  
6  
7

8  
9 As the registry data is to be combined with the data currently being extracted from the  
10  
11 individual patient records collected from each institution, we plan to validate the data reported  
12  
13 by the registries against patient records. At the time of writing, approximately half of the  
14  
15 gastric cancer patient records have been collected or identified as destroyed. Furthermore,  
16  
17 misclassification of cardia cancer diagnosis in the registries will be examined in relation to  
18  
19 oesophagogastroscopy findings. We are planning a number of studies to assess postoperative  
20  
21 complications and surgical factors such as anastomotic technique in relation to complications,  
22  
23 as well as validation of previously identified histological risk factors of long-term gastric  
24  
25 cancer mortality.<sup>18-20</sup> The collection of biobank samples is also gaining speed. The first update  
26  
27 and extension of the cohort with five more years of registry data and consequent patient  
28  
29 records and samples is planned for year 2022.  
30  
31  
32  
33  
34  
35  
36  
37  
38  
39  
40  
41  
42  
43  
44  
45  
46  
47  
48  
49  
50  
51  
52  
53  
54  
55  
56  
57  
58  
59  
60

## Strengths and limitations

This cohort profile describes the 10,457 gastric cancer patients included in initial phase of the nationwide, population-based retrospective FINEGO study.

There are multiple strengths to the FINEGO cohort. The large size of the cohort will make it one of the largest gastric cancer studies with patient records data and histological samples. Its population-based nationwide design together with patient identification from two separate, highly complete nationwide registries eliminates selection bias, and the planned collection and re-review of patient records and histological slides will be done to eliminate misclassification between gastric and oesophageal cancer. For mortality outcomes, the follow-up data is known to be 100% complete. Compared to the existing cohorts of gastric cancer, the majority of which are hospital-based multicentre cohorts originating from high-volume institutions, the present cohort adds real-life data from unselected patients operated at unselected institutions.

Possible limitations include the exclusion of non-operated cancer patients. The data collection of non-operated patients was deemed unfeasible by the consortium due to their large number and the complicated application process for study permissions from each of the more than 200 primary care facilities separately. The retrospective design allows the collection of large surgical dataset, but might potentially limit data quality, especially on variables that have not been routinely reported, such as smoking, alcohol use, the number of lymph nodes collected, or postoperative complications. Missing patient data due to missing or destroyed records might limit some analyses, but the high-quality registry data allows non-participation analysis along with the use of multiple imputation methods to overcome these issues.

The present cohort was formed using cancer diagnoses in both cancer and patient registry. Most of the patients were identified in both registries, while less than 10% of the patients

1  
2  
3 were not. It is plausible that some patients were not reported to the cancer registry, as the  
4 reporting is required by law but still on the clinicians' responsibility. For those that had no  
5 cancer diagnosis in the patient registry but still had cancer reported to the cancer registry, the  
6 reasons might be more complicated as the discharge diagnoses are required to discharge a  
7 patient and forwarded automatically to the registry. It might be that these patients had an  
8 unclear tumour at the time of operation and the cancer was reported to the cancer registry at  
9 the time of histological confirmation, but the diagnosis was not updated in the patient records  
10 at any time. In the future, the reasons for missing diagnoses are to be examined in detail after  
11 the completion of the collection of patient records.  
12  
13  
14  
15  
16  
17  
18  
19  
20  
21  
22  
23

24 The median age at surgery for the gastric cancer patients in the present study was quite  
25 constantly at 70 years, which is three years lower compared to surgically treated patients in a  
26 recent Swedish population-based study.<sup>21</sup> The male predominance (54.5%) observed in this  
27 study was somewhat less prominent than in the Swedish study, where 58% of the gastric non-  
28 cardia adenocarcinoma and 76% of cardia carcinoma were male,<sup>21</sup> as well as in a population-  
29 based study from the Netherlands where 61% were male.<sup>22</sup> The patients had less comorbidity  
30 (64.4% had no comorbidities) in the present study, compared to the population-based Swedish  
31 (58%-65%),<sup>21</sup> and Dutch studies (20-41%).<sup>22</sup> Taken together, the demographics of the gastric  
32 cancers in FINEGO are highly similar to other population-based studies in gastric cancer.  
33  
34  
35  
36  
37  
38  
39  
40  
41  
42  
43  
44  
45

46 According to the data provided by the cancer registry, the majority had local cancer, but also  
47 more than 30% had advanced cancer. Reflecting on the relatively good 5-year survival of 35%  
48 and taking into account the long study period it would be plausible that at least some of these  
49 patients might have had only local or locally advanced cancer at the time of the operation. It  
50 might be that such cancer might have been reported to the cancer registry not by the surgeon  
51 at operation, but only at the time of the recurrence by the oncologist, whereby a more  
52 advanced stage would have been registered. Histology was adenocarcinoma in the majority of  
53  
54  
55  
56  
57  
58  
59  
60

1  
2  
3 the patients with histology data available (94%), as expected. Dividing the patients into  
4  
5 intestinal and diffuse type cancers was not possible with the available data. We aim to  
6  
7 validate the cancer registry staging data against the patient records collected from each  
8  
9 individual to establish a view on the accuracy of cancer staging information after finishing the  
10  
11 data collection.  
12  
13

14  
15 The majority of the patients underwent gastrectomy while esophagectomy and combined  
16  
17 esophago-gastrectomy were probably more frequently used in cardia cancer. There were only  
18  
19 113 laparoscopic resections in the cohort, compared with more than 10,000 open procedures.  
20  
21 Gastric cancer is rarely diagnosed at early stage in Finland, and it was only recently shown  
22  
23 that laparoscopic gastrectomy has oncologically comparable results to open resection in  
24  
25 locally advanced cancer.<sup>23 24</sup> The low number may also reflect the fact that no separate code  
26  
27 exists for laparoscopic total gastrectomy in the NOMESCO-classification, which might result  
28  
29 in a notable underestimation of laparoscopic procedures for gastric cancer. However, total  
30  
31 gastrectomies may still be coded under “other laparoscopic gastrectomy”. The use of EMR  
32  
33 and ESD was also low, but these emerging treatments for early-stage or intarmucosal cancers  
34  
35 only suitable for a minority of the patients are more and more used. Neoadjuvant- and  
36  
37 perioperative treatments became more common in Finland during the last ten years of the  
38  
39 study period, after the publication of several landmark trials.<sup>6 25</sup> In the total cohort, 12% of the  
40  
41 patients underwent neoadjuvant or perioperative therapy, which mostly was given as  
42  
43 chemotherapy, with increase over time. Due to registration of neoadjuvant treatment, there  
44  
45 was no way to examine the use of HER-2 related treatment using registry data. However, this  
46  
47 is possible after finishing the data collection from the patient records.  
48  
49  
50  
51  
52  
53  
54

55 During the study period, gastric cancer resections have been heavily centralized by  
56  
57 governmental efforts. There were a total of 68 institutions that conducted gastrectomies  
58  
59 during the study period, while in 2015 there were only 19 institutions. Due to the rapidly  
60

1  
2  
3 decreasing incidence of gastric cancer, the median annual hospital volume of gastrectomies  
4  
5 has also decreased from 1987 to 2016. Low center volumes and gastric cancer becoming a  
6  
7 relatively rare cancer might at least partly explain the low adoption of minimally invasive  
8  
9 gastrectomies in clinical practice.  
10  
11

12  
13 The 5-year survival in the surgically treated gastric cancer patients (34.6%) reflects that of the  
14  
15 Swedish study (21%-44% in different 5-year periods),<sup>21</sup> and is in fact much better than  
16  
17 survival of the operated stage I-III non-cardia gastric adenocarcinoma patients (15%-29% in  
18  
19 the different time periods) in the Dutch study.<sup>22</sup> This observation further supports the  
20  
21 hypothesis that there might be some over-estimation of cancer stage for gastric cancer in the  
22  
23 Finnish Cancer Registry.  
24  
25

26  
27 Taken together, this population-based, nationwide retrospective cohort study will provide new  
28  
29 evidence regarding various unanswered questions in oesophageal and gastric cancer surgery  
30  
31 by combining epidemiological and clinical data, as well as complement randomized clinical  
32  
33 trials by assessing their findings in an unselected population.  
34  
35  
36  
37  
38  
39  
40  
41  
42  
43  
44  
45  
46  
47  
48  
49  
50  
51  
52  
53  
54  
55  
56  
57  
58  
59  
60

## Collaboration

All data from FINEGO presented in this article are stored by the research group on safe servers at University of Oulu, Finland, and handled confidentially. Currently, only the research team has access to the data. Researchers interested in collaboration, for example joint efforts combining the dataset with other population-based studies, are welcome to contact Joonas Kauppila (joonas.kauppila@oulu.fi), principal investigator.

For peer review only

## References

1. Global Burden of Disease Cancer C, Fitzmaurice C, Allen C, et al. Global, Regional, and National Cancer Incidence, Mortality, Years of Life Lost, Years Lived With Disability, and Disability-Adjusted Life-years for 32 Cancer Groups, 1990 to 2015: A Systematic Analysis for the Global Burden of Disease Study. *JAMA Oncol* 2017;3(4):524-48. doi: 10.1001/jamaoncol.2016.5688
2. Luo G, Zhang Y, Guo P, et al. Global patterns and trends in stomach cancer incidence: Age, period and birth cohort analysis. *Int J Cancer* 2017;141(7):1333-44. doi: 10.1002/ijc.30835 [published Online First: 2017/06/15]
3. : Finnish Cancer Registry; [Available from: <https://cancerregistry.fi/statistics/cancer-statistics/> accessed 5/3/2020.
4. Van Cutsem E, Sagaert X, Topal B, et al. Gastric cancer. *Lancet* 2016;388(10060):2654-64. doi: 10.1016/S0140-6736(16)30354-3
5. Ferlay J, Shin HR, Bray F, et al. Estimates of worldwide burden of cancer in 2008: GLOBOCAN 2008. *Int J Cancer* 2010;127(12):2893-917. doi: 10.1002/ijc.25516 [published Online First: 2011/02/26]
6. Cunningham D, Allum WH, Stenning SP, et al. Perioperative chemotherapy versus surgery alone for resectable gastroesophageal cancer. *N Engl J Med* 2006;355(1):11-20. doi: 10.1056/NEJMoa055531 [published Online First: 2006/07/11]
7. Asplund J, Kauppila JH, Mattsson F, et al. Survival Trends in Gastric Adenocarcinoma: A Population-Based Study in Sweden. *Ann Surg Oncol* 2018;25(9):2693-702. doi: 10.1245/s10434-018-6627-y [published Online First: 2018/07/11]
8. Gottlieb-Vedi E, Mattsson F, Lagergren P, et al. Annual hospital volume of surgery for gastrointestinal cancer in relation to prognosis. *Eur J Surg Oncol* 2019;45(10):1839-46. doi: 10.1016/j.ejso.2019.03.016 [published Online First: 2019/03/25]
9. Seufert RM, Schmidt-Matthiesen A, Beyer A. Total gastrectomy and oesophagojejunostomy--a prospective randomized trial of hand-sutured versus mechanically stapled anastomoses. *Br J Surg* 1990;77(1):50-2. doi: 10.1002/bjs.1800770118 [published Online First: 1990/01/01]
10. Takeyoshi I, Ohwada S, Ogawa T, et al. Esophageal anastomosis following gastrectomy for gastric cancer: comparison of hand-sewn and stapling technique. *Hepatogastroenterology* 2000;47(34):1026-9. [published Online First: 2000/10/06]
11. Brown AM, Giugliano DN, Berger AC, et al. Surgical approaches to adenocarcinoma of the gastroesophageal junction: the Siewert II conundrum. *Langenbecks Arch Surg* 2017;402(8):1153-58. doi: 10.1007/s00423-017-1610-9 [published Online First: 2017/08/15]
12. Thygesen LC, Ersboll AK. When the entire population is the sample: strengths and limitations in register-based epidemiology. *Eur J Epidemiol* 2014;29(8):551-8. doi: 10.1007/s10654-013-9873-0 [published Online First: 2014/01/11]
13. Maret-Ouda J, Tao W, Wahlin K, et al. Nordic registry-based cohort studies: Possibilities and pitfalls when combining Nordic registry data. *Scand J Public Health* 2017;45(17\_suppl):14-19. doi: 10.1177/1403494817702336 [published Online First: 2017/07/08]
14. Kauppila JH, Ohtonen P, Karttunen TJ, et al. Finnish National Esophago-Gastric Cancer Cohort (FINEGO) for studying outcomes after oesophageal and gastric cancer surgery: a protocol for a retrospective, population-based, nationwide cohort study in Finland. *BMJ Open* 2019;9(1):e024094. doi: 10.1136/bmjopen-2018-024094 [published Online First: 2019/02/21]
15. Ludvigsson JF, Otterblad-Olausson P, Pettersson BU, et al. The Swedish personal identity number: possibilities and pitfalls in healthcare and medical research. *Eur J Epidemiol* 2009;24(11):659-67. doi: 10.1007/s10654-009-9350-y [published Online First: 2009/06/09]
16. Brusselaers N, Lagergren J. The Charlson Comorbidity Index in Registry-based Research. *Methods Inf Med* 2017;56(5):401-06. doi: 10.3414/ME17-01-0051 [published Online First: 2017/01/01]

17. Cutler SJ, Ederer F. Maximum utilization of the life table method in analyzing survival. *J Chronic Dis* 1958;8(6):699-712. doi: 10.1016/0021-9681(58)90126-7 [published Online First: 1958/12/01]
18. Kemi NA, Eskuri M, Pohjanen VM, et al. Histological assessment of stromal maturity as a prognostic factor in surgically treated gastric adenocarcinoma. *Histopathology* 2019;75(6):882-89. doi: 10.1111/his.13934 [published Online First: 2019/06/08]
19. Kemi N, Eskuri M, Ikalainen J, et al. Tumor Budding and Prognosis in Gastric Adenocarcinoma. *Am J Surg Pathol* 2019;43(2):229-34. doi: 10.1097/PAS.0000000000001181 [published Online First: 2018/10/20]
20. Kemi N, Eskuri M, Herva A, et al. Tumour-stroma ratio and prognosis in gastric adenocarcinoma. *Br J Cancer* 2018;119(4):435-39. doi: 10.1038/s41416-018-0202-y [published Online First: 2018/07/31]
21. Asplund J, Kauppila JH, Mattsson F, et al. Survival Trends in Gastric Adenocarcinoma: A Population-Based Study in Sweden. *Ann Surg Oncol* 2018 doi: 10.1245/s10434-018-6627-y [published Online First: 2018/07/11]
22. Dassen AE, Lemmens VE, van de Poll-Franse LV, et al. Trends in incidence, treatment and survival of gastric adenocarcinoma between 1990 and 2007: a population-based study in the Netherlands. *Eur J Cancer* 2010;46(6):1101-10. doi: 10.1016/j.ejca.2010.02.013 [published Online First: 2010/03/12]
23. Beyer K, Baukloh AK, Kamphues C, et al. Laparoscopic versus open gastrectomy for locally advanced gastric cancer: a systematic review and meta-analysis of randomized controlled studies. *World J Surg Oncol* 2019;17(1):68. doi: 10.1186/s12957-019-1600-1 [published Online First: 2019/04/17]
24. Yu J, Huang C, Sun Y, et al. Effect of Laparoscopic vs Open Distal Gastrectomy on 3-Year Disease-Free Survival in Patients With Locally Advanced Gastric Cancer: The CLASS-01 Randomized Clinical Trial. *JAMA* 2019;321(20):1983-92. doi: 10.1001/jama.2019.5359 [published Online First: 2019/05/29]
25. Ychou M, Boige V, Pignon JP, et al. Perioperative chemotherapy compared with surgery alone for resectable gastroesophageal adenocarcinoma: an FNCLCC and FFCD multicenter phase III trial. *J Clin Oncol* 2011;29(13):1715-21. doi: 10.1200/JCO.2010.33.0597 [published Online First: 2011/03/30]



**Table 1. Identification of the gastric cancer patients by source registry**

|                                                                          | <b>Patients<br/>Number (%)</b> |
|--------------------------------------------------------------------------|--------------------------------|
| Total                                                                    | 10,457 (100)                   |
| Cancer diagnosis in both hospital discharge registry and cancer registry | 9,421 (90.1)                   |
| Cancer diagnosis in only hospital discharge registry                     | 699 (6.7)                      |
| Cancer diagnosis in only cancer registry                                 | 265 (2.5)                      |
| Unclear tumor diagnosis and surgery code in hospital discharge registry  | 72 (0.7)                       |

**Table 2. Demographics of the surgically treated gastric cancer patients in Finland 1987 - 2016**

|                                   | <b>Patients<br/>Number (%)</b> |
|-----------------------------------|--------------------------------|
| <b>Total</b>                      | 10,457 (100)                   |
| <b>Age at surgery</b>             |                                |
| ≤50 years                         | 1,017 (9.7)                    |
| 51-60 years                       | 1,605 (15.3)                   |
| 61-70 years                       | 2,856 (27.3)                   |
| 71-80 years                       | 3,479 (33.3)                   |
| >80 years                         | 1,500 (14.3)                   |
| <b>Sex</b>                        |                                |
| Male                              | 5,695 (54.5)                   |
| Female                            | 4,762 (45.5)                   |
| <b>Education</b>                  |                                |
| ≤12 years                         | 1,960 (18.7)                   |
| 13-15 years                       | 994 (9.5)                      |
| >15 years                         | 296 (2.8)                      |
| Missing                           | 7,207 (68.9)                   |
| <b>Charlson Comorbidity Index</b> |                                |
| 0                                 | 6,731 (64.4)                   |
| 1                                 | 2,408 (23.0)                   |
| 2                                 | 892 (8.5)                      |
| 3                                 | 287 (2.7)                      |
| ≥4                                | 139 (1.3)                      |
| <b>Stage</b>                      |                                |
| Local                             | 3,208 (30.7)                   |
| Locally advanced                  | 2,146 (20.5)                   |
| Advanced                          | 2,444 (23.4)                   |
| Unclear                           | 1,995 (18.3)                   |
| Missing                           | 744 (7.1)                      |
| <b>Histology</b>                  |                                |
| Adenocarcinoma                    | 9,154 (87.6)                   |
| Other                             | 559 (5.3)                      |
| Missing                           | 744 (7.1)                      |

**Table 3. Treatment details of the gastric cancer patients included in FINEGO**

|                                               | <b>Patients<br/>Number (%)</b> |
|-----------------------------------------------|--------------------------------|
| <b>Total</b>                                  | 10,457 (100)                   |
| <b>Surgery type</b>                           |                                |
| Gastrectomy                                   | 10,140 (97.0)                  |
| Esophagectomy                                 | 145 (1.4)                      |
| Esophagogastrectomy                           | 98 (0.9)                       |
| EMR or ESD                                    | 74 (0.7)                       |
| <b>Surgical Approach</b>                      |                                |
| Open                                          | 10,270 (98.2)                  |
| Minimally invasive                            | 113 (1.1)                      |
| Not applicable                                | 74 (0.7)                       |
| <b>Neoadjuvant or perioperative treatment</b> |                                |
| None                                          | 9,248 (88.4)                   |
| Chemotherapy                                  | 984 (9.4)                      |
| Radiotherapy                                  | 55 (0.5)                       |
| Chemoradiotherapy                             | 170 (1.6)                      |
| <b>Hospital volume of gastrectomy</b>         |                                |
| 1-10 per year                                 | 2,602 (24.9)                   |
| 11-20 per year                                | 3,428 (32.8)                   |
| 21-30 per year                                | 1,963 (18.8)                   |
| 31-81 per year                                | 2,236 (21.4)                   |
| Not applicable or available                   | 228 (2.2)                      |

## Figure legends

**Figure 1.** The number of incident gastric cancers and gastric cancer deaths, according to the Finnish Cancer Registry.<sup>3</sup>

**Figure 2.** Number of surgically treated gastric cancer patients between 1987 and 2016.

**Figure 3.** The median age at surgery and median annual volume of gastrectomies over time in Finland.

**Figure 4.** Kaplan-Meier curve depicting 10-year all-cause mortality in the surgically treated gastric cancer patients.

**Figure 5.** Kaplan-Meier curve depicting 10-year cancer-specific mortality in the gastric cancer patients.

1  
2  
3  
4  
5  
6  
7  
8  
9  
10  
11  
12  
13  
14  
15  
16  
17  
18  
19  
20  
21  
22  
23  
24  
25  
26  
27  
28  
29  
30  
31  
32  
33  
34  
35  
36  
37  
38  
39  
40  
41  
42  
43  
44  
45  
46  
47  
48  
49  
50  
51  
52  
53  
54  
55  
56  
57  
58  
59  
60

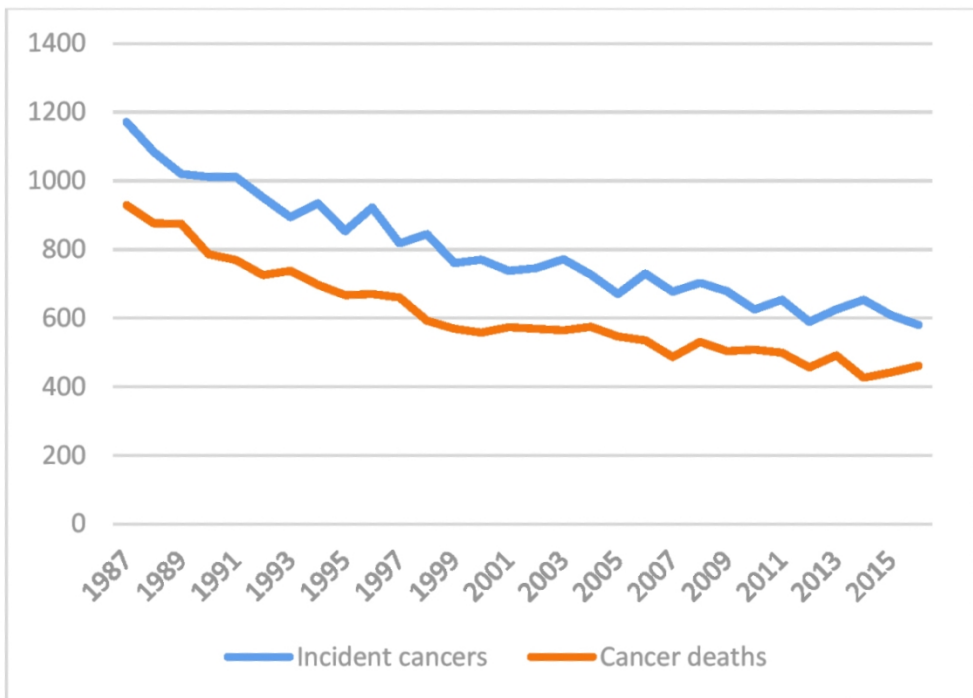

The number of incident gastric cancers and gastric cancer deaths, according to the Finnish Cancer Registry.

109x79mm (300 x 300 DPI)

1  
2  
3  
4  
5  
6  
7  
8  
9  
10  
11  
12  
13  
14  
15  
16  
17  
18  
19  
20  
21  
22  
23  
24  
25  
26  
27  
28  
29  
30  
31  
32  
33  
34  
35  
36  
37  
38  
39  
40  
41  
42  
43  
44  
45  
46  
47  
48  
49  
50  
51  
52  
53  
54  
55  
56  
57  
58  
59  
60

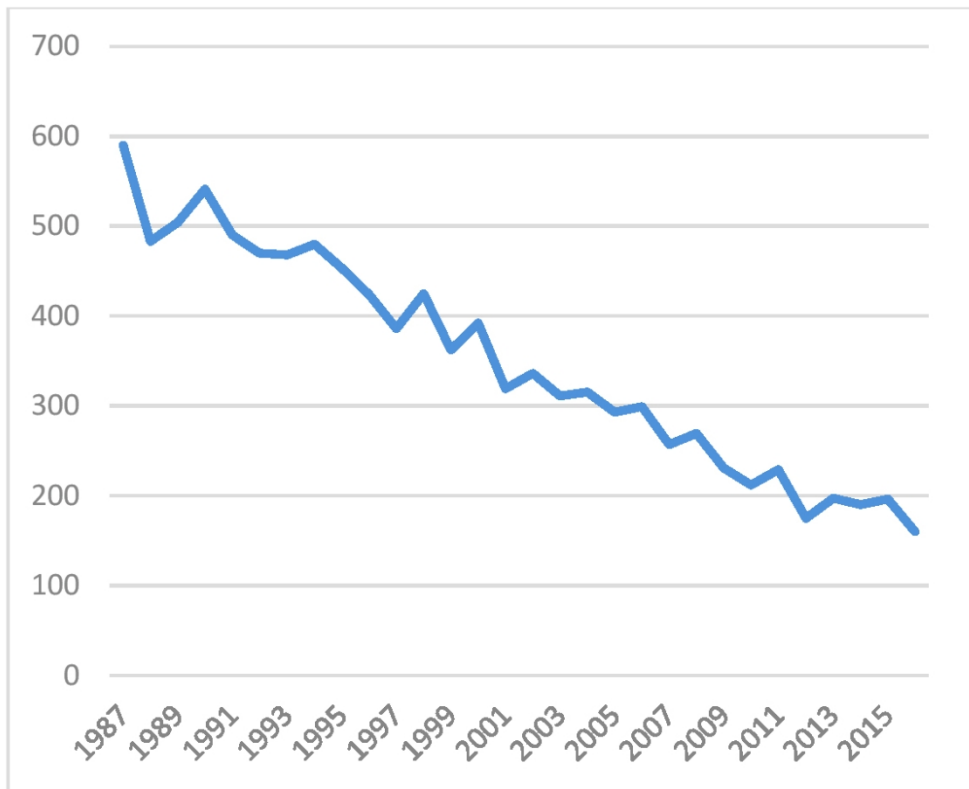

Number of surgically treated gastric cancer patients between 1987 and 2016.

99x81mm (300 x 300 DPI)

1  
2  
3  
4  
5  
6  
7  
8  
9  
10  
11  
12  
13  
14  
15  
16  
17  
18  
19  
20  
21  
22  
23  
24  
25  
26  
27  
28  
29  
30  
31  
32  
33  
34  
35  
36  
37  
38  
39  
40  
41  
42  
43  
44  
45  
46  
47  
48  
49  
50  
51  
52  
53  
54  
55  
56  
57  
58  
59  
60

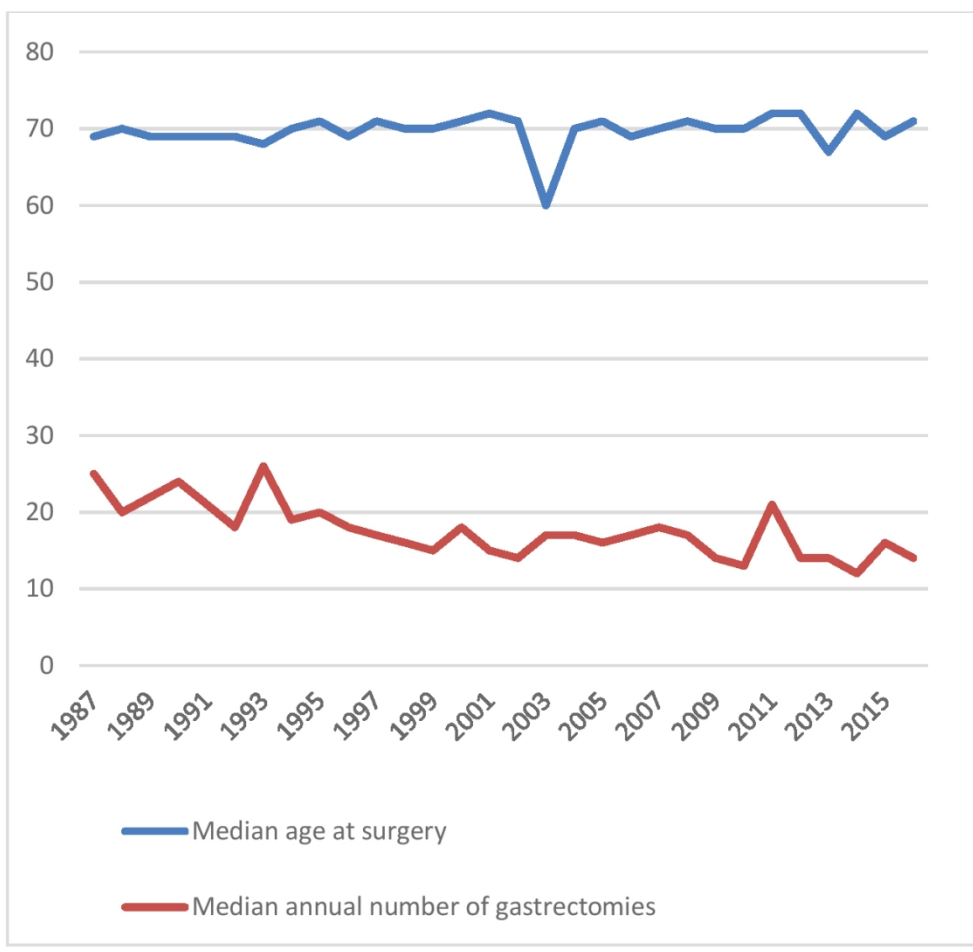

The median age at surgery and median annual volume of gastrectomies over time in Finland.

113x109mm (300 x 300 DPI)

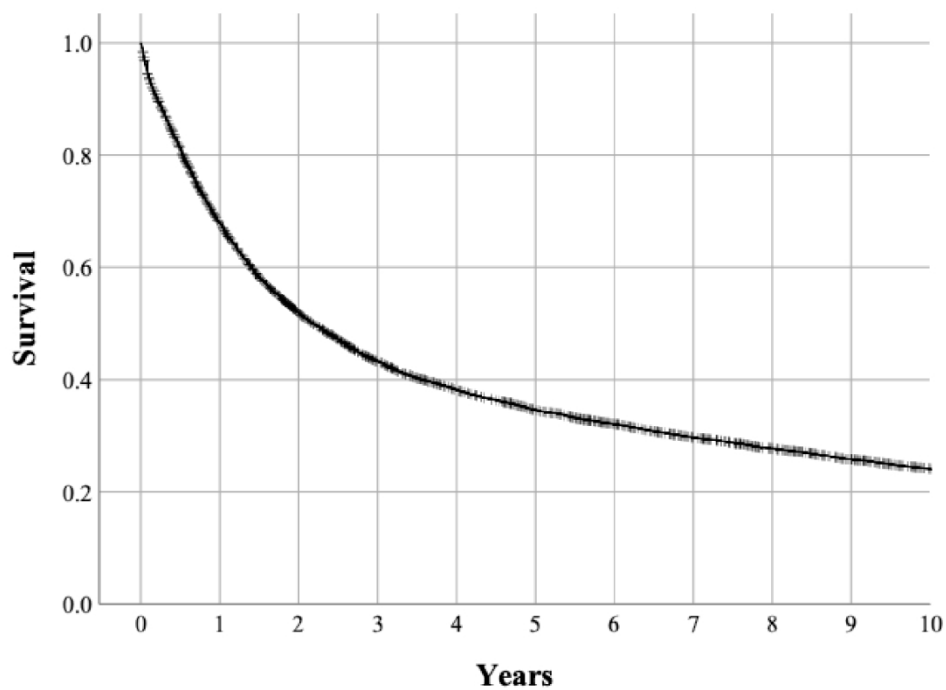

Kaplan-Meier curve depicting 10-year all-cause mortality in the surgically treated gastric cancer patients.

165x117mm (300 x 300 DPI)



1  
2  
3  
4  
5  
6  
7  
8  
9  
10  
11  
12  
13  
14  
15  
16  
17  
18  
19  
20  
21  
22  
23  
24  
25  
26  
27  
28  
29  
30  
31  
32  
33  
34  
35  
36  
37  
38  
39  
40  
41  
42  
43  
44  
45  
46  
47  
48  
49  
50  
51  
52  
53  
54  
55  
56  
57  
58  
59  
60

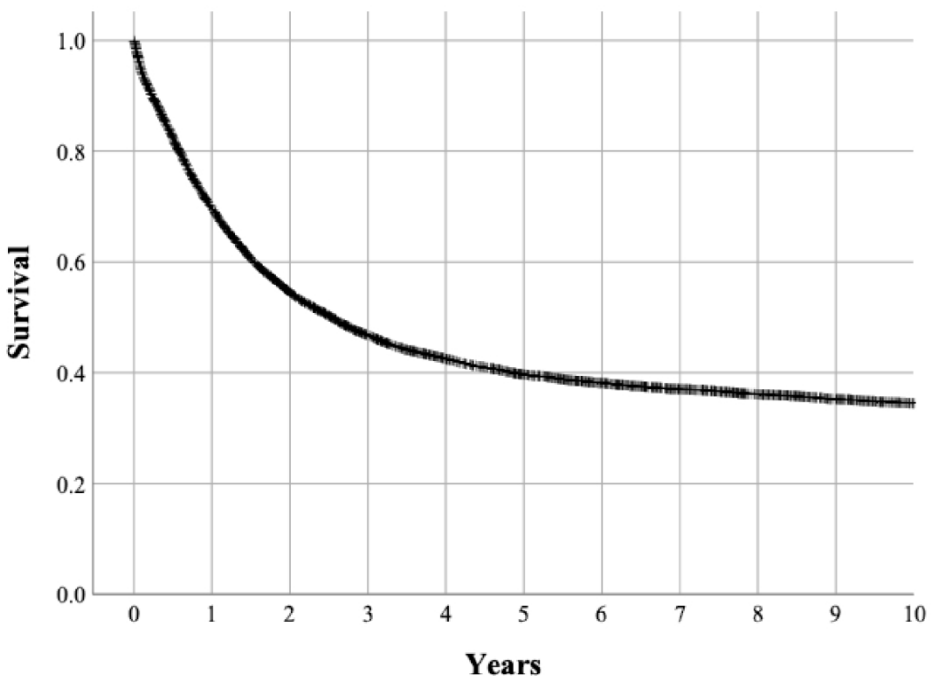

Kaplan-Meier curve depicting 10-year cancer-specific mortality in the gastric cancer patients.

165x117mm (300 x 300 DPI)

# BMJ Open

## Cohort Profile: gastric cancer in the population-based, Finnish National Esophago-Gastric Cancer Cohort (FINEGO) study.

|                                 |                                                                                                                                                                                                                                                                                                                                                                                                                                                                                                                                                                                                                                                                                                                                                                                                                                                                                                                                                                                                                                                                                                                                                                                                                                                                                                                                                                                                                                                                                                                                                                                                                               |
|---------------------------------|-------------------------------------------------------------------------------------------------------------------------------------------------------------------------------------------------------------------------------------------------------------------------------------------------------------------------------------------------------------------------------------------------------------------------------------------------------------------------------------------------------------------------------------------------------------------------------------------------------------------------------------------------------------------------------------------------------------------------------------------------------------------------------------------------------------------------------------------------------------------------------------------------------------------------------------------------------------------------------------------------------------------------------------------------------------------------------------------------------------------------------------------------------------------------------------------------------------------------------------------------------------------------------------------------------------------------------------------------------------------------------------------------------------------------------------------------------------------------------------------------------------------------------------------------------------------------------------------------------------------------------|
| Journal:                        | <i>BMJ Open</i>                                                                                                                                                                                                                                                                                                                                                                                                                                                                                                                                                                                                                                                                                                                                                                                                                                                                                                                                                                                                                                                                                                                                                                                                                                                                                                                                                                                                                                                                                                                                                                                                               |
| Manuscript ID                   | bmjopen-2020-039574.R1                                                                                                                                                                                                                                                                                                                                                                                                                                                                                                                                                                                                                                                                                                                                                                                                                                                                                                                                                                                                                                                                                                                                                                                                                                                                                                                                                                                                                                                                                                                                                                                                        |
| Article Type:                   | Cohort profile                                                                                                                                                                                                                                                                                                                                                                                                                                                                                                                                                                                                                                                                                                                                                                                                                                                                                                                                                                                                                                                                                                                                                                                                                                                                                                                                                                                                                                                                                                                                                                                                                |
| Date Submitted by the Author:   | 10-Aug-2020                                                                                                                                                                                                                                                                                                                                                                                                                                                                                                                                                                                                                                                                                                                                                                                                                                                                                                                                                                                                                                                                                                                                                                                                                                                                                                                                                                                                                                                                                                                                                                                                                   |
| Complete List of Authors:       | <p>Kauppila, Joonas; Karolinska Institutet Department of Molecular Medicine and Surgery, ; Oulun Yliopisto Laaketieteellisen tiedekunta, Cancer and Translational Medicine Research Unit</p> <p>Ohtonen, Pasi; Pohjois-Pohjanmaan Sairaanhoidopiiri, Department of Surgery</p> <p>Rantanen, Tuomo; Kuopion yliopistollinen sairaala, Department of Surgery; Etelä-Pohjanmaan keskussairaala, Department of Surgery</p> <p>Tyrväinen, Tuula; Tampereen yliopistollinen sairaala, Department of Gastroenterology and Alimentary Tract Surgery</p> <p>Toikkanen, Vesa; Tampereen yliopistollinen sairaala, Department of Cardiothoracic Surgery, Heart Center</p> <p>Pääaho, Minna; Oulun Yliopisto Laaketieteellisen tiedekunta, Surgery Research Unit</p> <p>Valtola, Antti; Kuopion yliopistollinen sairaala, Department of Surgery</p> <p>Räsänen, Jari; Helsingin ja Uudenmaan sairaanhoidopiiri, Department of General Thoracic and Oesophageal Surgery</p> <p>Kallio, Raija; Oulun Yliopisto Laaketieteellisen tiedekunta, Department of Oncology</p> <p>Sihvo, Eero; Keski Suomen Sairaanhoidopiiri, Department of Surgery</p> <p>Saarnio, Juha; Pohjois-Pohjanmaan Sairaanhoidopiiri, Department of Surgery</p> <p>Karttunen, Tuomo; Oulu University Hospital and University of Oulu, Medical Research Center</p> <p>Pohjanen, Vesa-Matti</p> <p>Ristimäki, Ari; Helsingin ja Uudenmaan sairaanhoidopiiri, Department of Pathology</p> <p>Laine, Simo; Varsinais-Suomen Sairaanhoidopiirin Kuntayhtymä, Department of Surgery</p> <p>Kokkola, Arto; Helsingin ja Uudenmaan sairaanhoidopiiri, Department of Surgery</p> |
| <b>Primary Subject Heading</b>: | Surgery                                                                                                                                                                                                                                                                                                                                                                                                                                                                                                                                                                                                                                                                                                                                                                                                                                                                                                                                                                                                                                                                                                                                                                                                                                                                                                                                                                                                                                                                                                                                                                                                                       |
| Secondary Subject Heading:      | Oncology, Gastroenterology and hepatology                                                                                                                                                                                                                                                                                                                                                                                                                                                                                                                                                                                                                                                                                                                                                                                                                                                                                                                                                                                                                                                                                                                                                                                                                                                                                                                                                                                                                                                                                                                                                                                     |
| Keywords:                       | SURGERY, Gastrointestinal tumours < ONCOLOGY, Gastrointestinal tumours < GASTROENTEROLOGY, GASTROENTEROLOGY, Adult oncology < ONCOLOGY                                                                                                                                                                                                                                                                                                                                                                                                                                                                                                                                                                                                                                                                                                                                                                                                                                                                                                                                                                                                                                                                                                                                                                                                                                                                                                                                                                                                                                                                                        |

1  
2  
3  
4  
5  
6  
7  
8  
9  
10  
11  
12  
13  
14  
15  
16  
17  
18  
19  
20  
21  
22  
23  
24  
25  
26  
27  
28  
29  
30  
31  
32  
33  
34  
35  
36  
37  
38  
39  
40  
41  
42  
43  
44  
45  
46  
47  
48  
49  
50  
51  
52  
53  
54  
55  
56  
57  
58  
59  
60

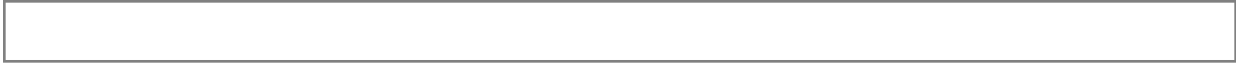

SCHOLARONE™  
Manuscripts

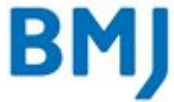

I, the Submitting Author has the right to grant and does grant on behalf of all authors of the Work (as defined in the below author licence), an exclusive licence and/or a non-exclusive licence for contributions from authors who are: i) UK Crown employees; ii) where BMJ has agreed a CC-BY licence shall apply, and/or iii) in accordance with the terms applicable for US Federal Government officers or employees acting as part of their official duties; on a worldwide, perpetual, irrevocable, royalty-free basis to BMJ Publishing Group Ltd ("BMJ") its licensees and where the relevant Journal is co-owned by BMJ to the co-owners of the Journal, to publish the Work in this journal and any other BMJ products and to exploit all rights, as set out in our [licence](#).

The Submitting Author accepts and understands that any supply made under these terms is made by BMJ to the Submitting Author unless you are acting as an employee on behalf of your employer or a postgraduate student of an affiliated institution which is paying any applicable article publishing charge ("APC") for Open Access articles. Where the Submitting Author wishes to make the Work available on an Open Access basis (and intends to pay the relevant APC), the terms of reuse of such Open Access shall be governed by a Creative Commons licence – details of these licences and which [Creative Commons](#) licence will apply to this Work are set out in our licence referred to above.

Other than as permitted in any relevant BMJ Author's Self Archiving Policies, I confirm this Work has not been accepted for publication elsewhere, is not being considered for publication elsewhere and does not duplicate material already published. I confirm all authors consent to publication of this Work and authorise the granting of this licence.

1  
2  
3 **Cohort Profile: gastric cancer in the population-based, Finnish National**  
4  
5  
6 **Esophago-Gastric Cancer Cohort (FINEGO) study**  
7  
8  
9  
10  
11

12 **Authors:** Joonas H. Kauppila<sup>1,2</sup>, Pasi Ohtonen<sup>1</sup>, Tuomo Rantanen<sup>3</sup>, Tuula Tyrväinen<sup>4</sup>, Vesa  
13 Toikkanen<sup>5</sup>, Minna Pääaho<sup>1</sup>, Antti Valtola<sup>3</sup>, Jari V. Räsänen<sup>6</sup>, Raija Kallio<sup>7</sup>, Eero Sihvo<sup>8</sup>, Juha  
14 Saarnio<sup>1</sup>, Tuomo J. Karttunen<sup>9</sup>, Vesa-Matti Pohjanen<sup>9</sup>, Ari Ristimäki<sup>10</sup>, Simo Laine<sup>11</sup>, Arto  
15 Kokkola<sup>12</sup>  
16  
17  
18  
19  
20  
21  
22  
23  
24  
25

26 **Affiliations:**

27  
28 <sup>1</sup>Surgery Research Unit, Medical Research Center Oulu, Oulu University Hospital and  
29 University of Oulu, Oulu, Finland;  
30  
31

32 <sup>2</sup>Upper Gastrointestinal Surgery, Department of Molecular Medicine and Surgery, Karolinska  
33 Institutet and Karolinska University Hospital, Stockholm, Sweden;  
34  
35

36  
37 <sup>3</sup>Department of Surgery, University of Eastern Finland and Kuopio University Hospital,  
38 Finland;  
39  
40

41 <sup>4</sup>Department of Gastroenterology and Alimentary Tract Surgery, Tampere University  
42 Hospital, Tampere, Finland;  
43  
44

45  
46 <sup>5</sup>Department of Cardiothoracic Surgery, Heart Center, Tampere University Hospital and  
47 University of Tampere, Tampere, Finland;  
48  
49

50  
51 <sup>6</sup>Department of General Thoracic and Oesophageal Surgery, Heart and Lung Centre,  
52 University of Helsinki and Helsinki University Hospital, Helsinki, Finland;  
53  
54

55  
56 <sup>7</sup>Department of Oncology and Haematology, Oulu University Hospital, Oulu, Finland;  
57

58 <sup>8</sup>Department of Surgery, Central Finland Central Hospital, Jyväskylä, Finland;  
59

60 <sup>9</sup>Cancer and Translational Medicine Research Unit, Medical Research Center, University of

1  
2  
3 Oulu and Oulu University Hospital, Oulu, Finland;  
4

5 <sup>10</sup>Department of Pathology, HUSLAB, and Applied Tumor Genomics Research Program,  
6  
7 Research Programs Unit, University of Helsinki and Helsinki University Hospital , Helsinki ,  
8  
9 Finland;  
10  
11

12 <sup>11</sup>The Division of Digestive Surgery and Urology, Turku University Hospital, Turku, Finland;  
13  
14 and  
15

16 <sup>12</sup>Department of Surgery, University of Helsinki and Helsinki University Hospital, Helsinki,  
17  
18 Finland.  
19  
20

21  
22  
23  
24  
25 **Corresponding author:** Joonas H. Kauppila, Surgery Research Unit, MRC Oulu, Oulu  
26  
27 University Hospital and University of Oulu, P.O. Box 5000, 90014 Oulu, Finland and Upper  
28  
29 Gastrointestinal Surgery, Department of Molecular Medicine and Surgery, Karolinska  
30  
31 Institutet and Karolinska University Hospital, Stockholm, Sweden. Email:  
32  
33

34 [Joonas.kauppila@oulu.fi](mailto:Joonas.kauppila@oulu.fi)  
35  
36  
37  
38  
39  
40

41 **Word count: 3040**  
42  
43  
44  
45  
46  
47  
48  
49  
50  
51  
52  
53  
54  
55  
56  
57  
58  
59  
60

## Abstract

### Purpose

The Finnish National Esophago-Gastric Cancer Cohort (FINEGO) was established with the aim of identifying factors that could contribute to improved outcomes in oesophago-gastric cancer. The aim of this study is to describe the gastric cancer patients included in FINEGO

### Participants

A total of 10,457 patients with gastric cancer or tumour diagnosis in the Finnish Cancer Registry or the Finnish Patient Registry during 1987-2016 were included in the cohort, with follow-up from Causes of Death registry until December 31<sup>st</sup>, 2016. All of the participants were at least 18 years of age, and had undergone either resectional or endoscopic mucosal surgery with curative or palliative intent.

### Findings to date

Of the 10,457 patients, 90.1% were identified to have cancer in both cancer and patient registries. In all, the median age was 70 at the time of surgery, 54.5% of the patients were male and 64.4% had no comorbidities. Education data was available for 31.1% of the patients, of whom the majority had had <12 years of formal education. Of the 7,798 with cancer staging data available, 41.1% had a local cancer. Adenocarcinoma was the most common (94.2%) histological type. Almost all patients underwent open gastrectomy and 214% in hospitals with annual volume of more than 30 gastrectomies per year. A total of 8,561 deaths occurred during the study period, of which 6,474 were due to oesophago-gastric cancers. The 5-year survival was 34.6% and 5-year cancer-specific survival was 39.7%.

### Future plans

1  
2  
3 The data in FINEGO can be currently used for registry-based research but is being expanded  
4  
5 by data extraction from patient records and scanning of histological samples from the Finnish  
6  
7 biobanks. Initially, we are planning on studies on the national trends in treatment and  
8  
9 mortality, and studies on the demographic factors and their influence on survival.  
10  
11  
12  
13  
14  
15  
16  
17  
18  
19  
20  
21  
22  
23  
24  
25  
26  
27  
28  
29  
30  
31  
32  
33  
34  
35  
36  
37  
38  
39  
40  
41  
42  
43  
44  
45  
46  
47  
48  
49  
50  
51  
52  
53  
54  
55  
56  
57  
58  
59  
60

For peer review only



## Article Summary

### Strengths and limitations of this study:

- The main strength of the study is the population-based design with complete and accurate ascertainment of all patients diagnosed with gastric cancer in Finland, counteracting selection bias.
- The follow-up of participants is complete.
- The main limitations are the exclusion of patients not undergoing surgery and registry information lag of up to two years.
- Some registry-based variables, such as laparoscopic surgery or neoadjuvant therapy are of questionable quality and should be interpreted cautiously before validation studies.
- The dataset will be complemented with patient records and histological slides collection to allow a wide variety of research questions.

**Funding statement:** This work is supported by research grants from the Sigrid Jusélius Foundation (Sigrid Juséliuksen Säätiö), The Finnish Cancer Foundation (Syöpäsäätiö), Päivikki and Sakari Sohlberg Foundation and Orion Research Foundation (Orionin Tutkimussäätiö). The funding sources have no role in the design and conduct of the study; collection, management, analysis, and interpretation of the data; preparation, review, or approval of the manuscript; or decision to submit the study protocol for publication.

**Competing interests statement:** The authors state no potential competing interests.

**Author contributions:**

Study idea: JHK; Concept and design: JHK, PO, TR, TT, VT, MP, AV, JVR, RK, JS, ES, TJK, VMP, AR, SL, AK; Data collection tools development: JHK, PO, TR, MP, JVR, ES, TJK, VMP, SL, AK; Obtained permissions: JHK, MP; Obtained funding: JHK; Statistical analysis: JHK, PO; Interpretation: JHK, PO, TR, TT, VT, MP, AV, JVR, RK, JS, ES, TJK, VMP, AR, SL, AK; Drafted the manuscript: JHK; Critical revision for intellectual content and accepted submitted version JHK, PO, TR, TT, VT, MP, AV, JVR, RK, JS, ES, TJK, VMP, AR, SL, AK; Guarantor: JHK.

**Data sharing statement:**

All data from FINEGO presented in this article are stored by the research group on safe servers at University of Oulu, Finland, and handled confidentially. Currently, only the research team has access to the data. Data access to collaborators can be granted given that relevant government and health officials approve the collaborative study. Researchers interested in collaboration, for example joint efforts combining the dataset with other population-based studies, are welcome to contact Joonas Kauppila (joonas.kauppila@oulu.fi), principal investigator.

## Introduction

Gastric cancer is the third leading cause of cancer death worldwide.<sup>1</sup> Gastric cancer incidence is slowly decreasing,<sup>2</sup> also in Finland (Figure 1),<sup>3</sup> but the incident cancers are often diagnosed at a late stage.<sup>4</sup> The dominant histologic type is adenocarcinoma, and only less than 5% of all gastric cancers represent other histological types.<sup>5</sup> The standard treatment of gastric cancer is surgery, in certain stages accompanied by neoadjuvant or perioperative therapy.<sup>4,6</sup> Even after curative surgery, gastric cancers have poor survival.<sup>4,7</sup>

However, there are many unclear topics and gaps of knowledge in the treatment of gastric cancer, such as whether high hospital or surgeon volumes, or oncologic treatment improve gastric cancer survival,<sup>8</sup> whether certain anastomotic techniques are associated with less postoperative complications,<sup>9,10</sup> and whether Siewert II gastric cardia cancer should be resected by oesophagectomy or gastrectomy,<sup>11</sup> to name a few. The population-based nationwide cohort would be the ideal study design to evaluate these questions,<sup>12</sup> as randomized controls would be either unfeasible, or would need to include a very large amount of patients.

The Finnish registry data is known to be of high quality with high completeness.<sup>13</sup> To facilitate surgical research with appropriate in-depth clinical variables, we started a national collaborative with the aim to create a population-based cohort on gastric cancer in Finland with extensive data collection from the nationwide registries and patient records. The collaborative and the cohort was named The Finnish National Esophago-Gastric Cancer Cohort (FINEGO).<sup>14</sup>

In this cohort profile, we describe the registry data on 10,457 gastric cancer patients included in FINEGO. Esophageal cancer patients are described in a separate study.

## Cohort description

FINEGO is a population-based, nationwide, retrospective cohort study of all surgically treated esophageal and gastric cancer patients in Finland since 1987. Senior surgeons, oncologists, pathologists and statisticians are involved in the collaborative group, representing the six Finnish hospitals and the related universities actively participating in surgical treatment and research of esophago-gastric cancer.

The inclusion criteria of the study were:

- Age at least 18 years at the time of cancer diagnosis
- Primary cancer of epithelial origin in the oesophagus, cardia, or stomach
- Surgical treatment given for cancer, including all types of surgery or endoscopic resection

However, as there is a possibility of misclassification in the registries, the data collection was somewhat broader. All cancers of any origin were included during the registry data collection to avoid excluding misclassified patients. Furthermore, patients with unclear tumor diagnoses undergoing surgical resection were also included to reduce selection bias. All patients without surgically treatment were excluded from the cohort.

For this manuscript, only gastric cancers are included.

### Data sources

The data were collected from the Finnish Cancer Registry, Finnish Patient Registry and Statistics Finland. The immutable, 11-digit personal identification number assigned to each

1  
2  
3 resident in the country was used to combine the registry data.<sup>15</sup> Personal identity number  
4  
5 contains information on date of birth and sex, and was used to derive age information.  
6  
7

8 *The Finnish Cancer Registry* provided data on incident cancers, including topography or  
9  
10 cancer location, histology, cancer stage (local, locally advanced, advanced), and whether  
11  
12 chemotherapy, radiotherapy, or surgical treatment was given.  
13  
14

15  
16 *The Finnish Patient Registry* has data on admission and discharge dates, operations codes,  
17  
18 diagnosis codes and the hospital or healthcare unit identification number where these codes  
19  
20 were assigned. These data were used to identify incident cancers and patients receiving  
21  
22 surgical treatment, as well as for calculating comorbidities and annual hospital volume of  
23  
24 gastric cancer surgery. Comorbidities were defined using the well-validated Charlson  
25  
26 Comorbidity Index (CCI) not including gastric cancer, by retrieving diagnoses before index  
27  
28 admission for surgery.<sup>16</sup> Neoadjuvant therapy codes were used to find patients undergoing  
29  
30 neoadjuvant or perioperative treatment. The annual hospital volume was assessed by  
31  
32 calculating the number of gastrectomies for the study patients during the year of surgery in the  
33  
34 hospital the patient was operated in.  
35  
36  
37  
38

39  
40 *Statistics Finland* provided data on the dates and causes of death, which are 100% and >99%  
41  
42 complete, respectively. Education registry had information on education starting from year  
43  
44 1970 and it was used for obtaining the highest education grade of the patients.  
45  
46  
47  
48  
49

50  
51 Incident cancers were identified from cancer registry records and patient registry, using the  
52  
53 relevant topographic in the cancer registry, and ICD-9 and ICD-10 codes in the patient  
54  
55 registry.<sup>14</sup> The patient had to have cancer diagnosis in either of the registries, to ensure  
56  
57 complete identification. Surgical codes concerning gastrectomy or endoscopic mucosal  
58  
59  
60

1  
2  
3 surgery were then searched in the *Patient Registry* to identify patients undergoing surgical  
4  
5 treatment.<sup>14</sup>  
6  
7  
8  
9

### 10 11 Statistics

12  
13  
14 The demographic factors were tabulated and Kaplan-Meier curves were calculated according  
15  
16 to the life table method.<sup>17</sup> The endpoints were all-cause mortality and cancer-specific  
17  
18 mortality, defined as mortality for esophago-gastric cancers to reduce misclassification bias.  
19  
20  
21  
22  
23  
24

### 25 26 Permissions and registration

27  
28  
29 The study has been approved by ethical committee in Northern Ostrobothnia (EETMK  
30  
31 115/2016), The National Institute for Health and Welfare (THL/169/5.05.00), Statistics  
32  
33 Finland (TK-53-1478-17) and the Office of the Data Protection Ombudsman (Dnro  
34  
35 506/402/17), Finland. Relevant local permissions and registrations were obtained from all the  
36  
37 21 hospital districts. Individual informed consent will not be sought from the patients whose  
38  
39 data are used in this observational study. Obtaining the informed consent has been waived by  
40  
41 the Finnish law. The study will be conducted in accordance with the Declaration of Helsinki.  
42  
43  
44  
45  
46  
47  
48

### 49 50 Patient and public involvement

51  
52 Patients or public were not involved in the development of the research question and study  
53  
54 design or conducting the present study.  
55  
56  
57  
58  
59  
60

## Findings to date

A total of 10,457 patients were surgically treated for gastric cancer in Finland during years 1987-2016. This is almost 40% more than the initial estimate of 7,500 patients.<sup>14</sup> As seen in Figure 2, majority of the patients were operated during the first half of the study period, beginning with almost 12 operated gastric cancer patients per 100,000 population in 1987 and linearly declining to less than 2 / 100,000 population in the whole country in 2016. According to the official statistics, also the number of incident gastric cancer cases and deaths decreased during the study period (Figure 1).<sup>3</sup>

The vast majority of patients (90.1%) were identified to have cancer in both patient and cancer registry, while 7.4% had cancer or unclear tumor diagnosis in the patient registry only, and 2.5% had cancer diagnosis in the cancer registry only (Table 1).

Table 2 summarizes the demographic variables of the patients. The median age at the time of operation during the whole study period was 70.0 years, and remained quite constant over time (Figure 3). The proportion of males was 54.5% (n=5,695). Education data was lacking in 68.9% (7,207) of the patients, and of those with data available, the majority had less than 12 years of formal education. Most of the patients had CCI of 0 at the time of operation (n=6,731, 64.6%), while 2,408 (23.0%) had CCI of 1 and 1,318 (12.6%) had CCI of 2 or more.

Cancer staging was available for 7,798 (74.6%) patients. Of these 7,798 patients, 41.1% had local cancer, 27.5% had locally advanced cancer, and 31.3% had advanced cancer according to the cancer registry. Histology was available for 9,713 patients, of whom the majority had adenocarcinoma (94.2%). More accurate definition of histomorphology was not reliably possible using registry data.

1  
2  
3 The details on treatment are summarized in Table 3. The absolute majority underwent  
4  
5  
6  
7  
8  
9  
10  
11  
12  
13  
14  
15  
16  
17  
18  
19  
20  
21  
22  
23  
24  
25  
26  
27  
28  
29  
30  
31  
32  
33  
34  
35  
36  
37  
38  
39  
40  
41  
42  
43  
44  
45  
46  
47  
48  
49  
50  
51  
52  
53  
54  
55  
56  
57  
58  
59  
60  
The details on treatment are summarized in Table 3. The absolute majority underwent  
gastrectomy (n=10,140, 97.0%), including total and partial gastrectomies, followed by  
esophagectomy, combined esophagogastrectomy, and EMR or ESD, respectively. Minimally  
invasive (laparoscopic) approach was used in only 113 patients. Neoadjuvant or perioperative  
treatment was given to 1,209 (11.6%) patients, with chemotherapy alone being the most  
common modality. The use of neoadjuvant or perioperative treatment increased from 8.3% in  
1987-2006 to 24.6% in 2007-2016.

Median annual hospital volume only decreased over time from over 20 gastrectomies per year  
to around 15 gastrectomies per year during the study period (Figure 3), despite the strong  
decrease in the total number of gastrectomies in the country (Figure 2). Of all patients, 2,602  
(24.9%) were operated in hospitals performing 1 to 10 gastrectomies per year, and 2,236  
(21.4%) in hospitals performing 31 to 81 gastrectomies per year (Table 3).

There were 8,561 deaths during the study period, of which 6,474 were due to oesophago-  
gastric cancer according to the causes of death registry. Of the 10,457 patients, 67.9% were  
alive at 1 year after surgery, 43.3 were alive at 3 years after surgery, 34.6% were alive at 5  
years after surgery, and 24.1% at 10 years after surgery (Figure 4). For cancer-specific  
survival, the respective figures were 69.7% at 1 year after surgery, 46.8 at 3 years after  
surgery, 39.7% were alive at 5 years after surgery, and 34.5% at 10 years after surgery (Figure  
5).

### Future plans

In its present form, the FINEGO cohort can be used for conducting epidemiological research  
including the above registry-based variables. The future studies using this data include a study  
on the trends of gastric cancer over time in Finland, as well as examining the influence of age,



1  
2  
3 sex, and comorbidities on the mortality of gastric cancer patients. Annual hospital volume in  
4  
5 relation to short- and long-term mortality will also be assessed.  
6  
7

8  
9 As the registry data is to be combined with the data currently being extracted from the  
10  
11 individual patient records collected from all hospitals in Finland, we plan to validate the data  
12  
13 reported by the registries against patient records. At the time of writing, approximately half of  
14  
15 the gastric cancer patient records have been identified or collected, the minority of which have  
16  
17 been declared as destroyed. The assessment of patient records for clinical variables will allow  
18  
19 accurate estimation of the proportion missing records in the future. The variables extracted  
20  
21 from the patient records are presented in Supplementary file 1. Furthermore, misclassification  
22  
23 of cardia cancer diagnosis in the registries will be examined in relation to  
24  
25 oesophagogastroscopy findings. After completion of clinical data retrieval from the patient  
26  
27 records and pathology, we are planning a number of studies to assess postoperative  
28  
29 complications and surgical factors such as anastomotic technique in relation to complications,  
30  
31 as well as validation of previously identified histological risk factors of long-term gastric  
32  
33 cancer mortality.<sup>18-20</sup> The collection and evaluation of biobank samples for histological  
34  
35 diagnoses is also gaining speed. The first update and extension of the cohort with five more  
36  
37 years of registry data and consequent patient records and samples is planned for year 2022.  
38  
39  
40  
41  
42  
43  
44  
45  
46  
47  
48  
49  
50  
51  
52  
53  
54  
55  
56  
57  
58  
59  
60

## Strengths and limitations

This cohort profile describes the 10,457 gastric cancer patients included in initial period 1987-2016 of the nationwide, population-based retrospective FINEGO study.

There are multiple strengths to the FINEGO cohort. The large size of the cohort will make it one of the largest gastric cancer studies with patient records data and histological samples. Its population-based nationwide design together with patient identification from two separate, highly complete nationwide registries eliminates selection bias, and the planned collection and re-review of patient records and histological slides will be done to eliminate misclassification between gastric and oesophageal cancer. For mortality outcomes, the follow-up data is known to be 100% complete. Compared to the existing cohorts of gastric cancer, the majority of which are hospital-based multicentre cohorts originating from high-volume institutions, the present cohort adds real-life data from unselected patients operated at unselected institutions.

Possible limitations include the exclusion of non-operated cancer patients. The data collection of non-operated patients was deemed unfeasible by the consortium due to their large number and the complicated application process for study permissions from each of the more than 200 primary care facilities separately. The retrospective design allows the collection of large surgical dataset, but might potentially limit data quality, especially on variables that have not been routinely reported, such as smoking, alcohol use, the number of lymph nodes collected, or postoperative complications. Furthermore, the long time span of the study might be a limitation in some studies evaluating treatment effects on survival due to changes in patterns of treatment over time. Missing patient data due to missing or destroyed records might limit some analyses, but the high-quality registry data allows non-participation analysis along with the use of multiple imputation methods to overcome these issues.

1  
2  
3 The present cohort was formed using cancer diagnoses in both cancer and patient registry.  
4  
5 Most of the patients were identified in both registries, while less than 10% of the patients  
6  
7 were not. It is plausible that some patients were not reported to the cancer registry, as the  
8  
9 reporting is required by law but still on the clinicians' responsibility. For those that had no  
10  
11 cancer diagnosis in the patient registry but still had cancer reported to the cancer registry, the  
12  
13 reasons might be more complicated as the discharge diagnoses are required to discharge a  
14  
15 patient and forwarded automatically to the registry. It might be that these patients had an  
16  
17 unclear tumour at the time of operation and the cancer was reported to the cancer registry at  
18  
19 the time of histological confirmation, but the diagnosis was not updated in the patient records  
20  
21 at any time. In the future, the reasons for missing diagnoses are to be examined in detail after  
22  
23 the completion of the collection of patient records.  
24  
25  
26  
27  
28

29 The median age at surgery for the gastric cancer patients in the present study was quite  
30  
31 constantly at 70 years, which is three years lower compared to surgically treated patients in a  
32  
33 recent Swedish population-based study.<sup>21</sup> The male predominance (54.5%) observed in this  
34  
35 study was somewhat less prominent than in the Swedish study, where 58% of the gastric non-  
36  
37 cardia adenocarcinoma and 76% of cardia carcinoma were male,<sup>21</sup> as well as in a population-  
38  
39 based study from the Netherlands where 61% were male.<sup>22</sup> The patients had less comorbidity  
40  
41 (64.4% had no comorbidities) in the present study, compared to the population-based Swedish  
42  
43 (58%-65%),<sup>21</sup> and Dutch studies (20-41%).<sup>22</sup> Taken together, the demographics of the gastric  
44  
45 cancers in FINEGO are highly similar to other population-based studies in gastric cancer.  
46  
47  
48

49 Education data was missing for the majority due to the introduction of education registry in  
50  
51 1970, when the majority of the patients had already obtained their highest education.  
52  
53  
54

55 According to the data provided by the cancer registry, the majority had local cancer, but also  
56  
57 more than 30% had advanced cancer. Reflecting on the relatively good 5-year survival of 35%  
58  
59 and taking into account the long study period it would be plausible that at least some of these  
60

1  
2  
3 patients might have had only local or locally advanced cancer at the time of the operation. It  
4  
5 might be that such cancer might have been reported to the cancer registry not by the surgeon  
6  
7 at operation, but only at the time of the recurrence by the oncologist, whereby a more  
8  
9 advanced stage would have been registered. Histology was adenocarcinoma in the majority of  
10  
11 the patients with histology data available (94%), as expected. Dividing the patients into  
12  
13 intestinal and diffuse type cancers was not possible with the available data, as the majority of  
14  
15 the patients had a histomorphology code of adenocarcinoma NOS. We aim to validate the  
16  
17 cancer registry staging data against the patient records collected from each individual to  
18  
19 establish a view on the accuracy of cancer staging information after finishing the patient  
20  
21 records and pathology data collection.  
22  
23  
24  
25

26  
27 The majority of the patients underwent gastrectomy while esophagectomy and combined  
28  
29 esophago-gastrectomy were probably more frequently used in cardia cancer. There were only  
30  
31 113 laparoscopic resections in the cohort, compared with more than 10,000 open procedures.  
32  
33 Gastric cancer is rarely diagnosed at early stage in Finland, and it was only recently shown  
34  
35 that laparoscopic gastrectomy has oncologically comparable results to open resection in  
36  
37 locally advanced cancer.<sup>23 24</sup> The low number may also reflect the fact that no separate code  
38  
39 exists for laparoscopic total gastrectomy in the NOMESCO-classification, which might result  
40  
41 in a notable underestimation of laparoscopic procedures for gastric cancer. However, total  
42  
43 gastrectomies may still be coded under “other laparoscopic gastrectomy”. The use of EMR  
44  
45 and ESD was also low, but these emerging treatments for early-stage or intramucosal cancers  
46  
47 only suitable for a minority of the patients are more and more used. Neoadjuvant- and  
48  
49 perioperative treatments became more common in Finland during the last ten years of the  
50  
51 study period, after the publication of several landmark trials.<sup>6 25</sup> In the total cohort, 12% of the  
52  
53 patients underwent neoadjuvant or perioperative therapy, which mostly was given as  
54  
55 chemotherapy, with increase over time. As Finnish Cancer Registry relies on passive  
56  
57  
58  
59  
60

1  
2  
3 recording (clinician notifications) on oncological treatments, it is possible that some or even a  
4 majority of oncological treatments have not been recorded, resulting in a probable  
5 underestimation of oncological treatments. Due to registration of neoadjuvant treatment, there  
6 was no way to examine the use of HER-2 related treatment using registry data. However, this  
7 is possible after finishing the data collection from the patient records.  
8  
9

10  
11  
12 During the study period, gastric cancer resections have been heavily centralized by  
13 governmental efforts. There were a total of 68 institutions that conducted gastrectomies  
14 during the study period, while in 2015 there were only 19 institutions. Due to the rapidly  
15 decreasing incidence of gastric cancer, the median annual hospital volume of gastrectomies  
16 has also decreased from 1987 to 2016. Low center volumes and gastric cancer becoming a  
17 relatively rare cancer might at least partly explain the slow adoption of minimally invasive  
18 gastrectomies in clinical practice.  
19  
20  
21  
22  
23  
24  
25  
26  
27  
28  
29  
30

31  
32 The 5-year survival in the surgically treated gastric cancer patients (34.6%) reflects that of the  
33 Swedish study (21%-44% in different 5-year periods),<sup>21</sup> and is in fact much better than  
34 survival of the operated stage I-III non-cardia gastric adenocarcinoma patients (15%-29% in  
35 the different time periods) in the Dutch study.<sup>22</sup> This observation further supports the  
36 hypothesis that there might be some over-estimation of cancer stage for gastric cancer in the  
37 Finnish Cancer Registry.  
38  
39  
40  
41  
42  
43  
44  
45  
46

47 Taken together, this population-based, nationwide retrospective cohort study will provide new  
48 evidence regarding various unanswered questions in oesophageal and gastric cancer surgery  
49 by combining epidemiological and clinical data, as well as complement randomized clinical  
50 trials by assessing their findings in an unselected population.  
51  
52  
53  
54  
55  
56  
57  
58  
59  
60

## Collaboration

All data from FINEGO presented in this article are stored by the research group on safe servers at University of Oulu, Finland, and handled confidentially. Currently, only the research team has access to the data. Data access to collaborators can be granted given that relevant government and health officials approve the collaborative study. Researchers interested in collaboration, for example joint efforts combining the dataset with other population-based studies, are welcome to contact Joonas Kauppila (joonas.kauppila@oulu.fi), principal investigator.

## References

1. Global Burden of Disease Cancer C, Fitzmaurice C, Allen C, et al. Global, Regional, and National Cancer Incidence, Mortality, Years of Life Lost, Years Lived With Disability, and Disability-Adjusted Life-years for 32 Cancer Groups, 1990 to 2015: A Systematic Analysis for the Global Burden of Disease Study. *JAMA Oncol* 2017;3(4):524-48. doi: 10.1001/jamaoncol.2016.5688
2. Luo G, Zhang Y, Guo P, et al. Global patterns and trends in stomach cancer incidence: Age, period and birth cohort analysis. *Int J Cancer* 2017;141(7):1333-44. doi: 10.1002/ijc.30835 [published Online First: 2017/06/15]
3. : Finnish Cancer Registry; [Available from: <https://cancerregistry.fi/statistics/cancer-statistics/> accessed 5/3/2020.
4. Van Cutsem E, Sagaert X, Topal B, et al. Gastric cancer. *Lancet* 2016;388(10060):2654-64. doi: 10.1016/S0140-6736(16)30354-3
5. Ferlay J, Shin HR, Bray F, et al. Estimates of worldwide burden of cancer in 2008: GLOBOCAN 2008. *Int J Cancer* 2010;127(12):2893-917. doi: 10.1002/ijc.25516 [published Online First: 2011/02/26]
6. Cunningham D, Allum WH, Stenning SP, et al. Perioperative chemotherapy versus surgery alone for resectable gastroesophageal cancer. *N Engl J Med* 2006;355(1):11-20. doi: 10.1056/NEJMoa055531 [published Online First: 2006/07/11]
7. Asplund J, Kauppila JH, Mattsson F, et al. Survival Trends in Gastric Adenocarcinoma: A Population-Based Study in Sweden. *Ann Surg Oncol* 2018;25(9):2693-702. doi: 10.1245/s10434-018-6627-y [published Online First: 2018/07/11]
8. Gottlieb-Vedi E, Mattsson F, Lagergren P, et al. Annual hospital volume of surgery for gastrointestinal cancer in relation to prognosis. *Eur J Surg Oncol* 2019;45(10):1839-46. doi: 10.1016/j.ejso.2019.03.016 [published Online First: 2019/03/25]
9. Seufert RM, Schmidt-Matthiesen A, Beyer A. Total gastrectomy and oesophagojejunostomy--a prospective randomized trial of hand-sutured versus mechanically stapled anastomoses. *Br J Surg* 1990;77(1):50-2. doi: 10.1002/bjs.1800770118 [published Online First: 1990/01/01]
10. Takeyoshi I, Ohwada S, Ogawa T, et al. Esophageal anastomosis following gastrectomy for gastric cancer: comparison of hand-sewn and stapling technique. *Hepatogastroenterology* 2000;47(34):1026-9. [published Online First: 2000/10/06]
11. Brown AM, Giugliano DN, Berger AC, et al. Surgical approaches to adenocarcinoma of the gastroesophageal junction: the Siewert II conundrum. *Langenbecks Arch Surg* 2017;402(8):1153-58. doi: 10.1007/s00423-017-1610-9 [published Online First: 2017/08/15]
12. Thygesen LC, Ersboll AK. When the entire population is the sample: strengths and limitations in register-based epidemiology. *Eur J Epidemiol* 2014;29(8):551-8. doi: 10.1007/s10654-013-9873-0 [published Online First: 2014/01/11]
13. Maret-Ouda J, Tao W, Wahlin K, et al. Nordic registry-based cohort studies: Possibilities and pitfalls when combining Nordic registry data. *Scand J Public Health* 2017;45(17\_suppl):14-19. doi: 10.1177/1403494817702336 [published Online First: 2017/07/08]
14. Kauppila JH, Ohtonen P, Karttunen TJ, et al. Finnish National Esophago-Gastric Cancer Cohort (FINEGO) for studying outcomes after oesophageal and gastric cancer surgery: a protocol for a retrospective, population-based, nationwide cohort study in Finland. *BMJ Open* 2019;9(1):e024094. doi: 10.1136/bmjopen-2018-024094 [published Online First: 2019/02/21]
15. Ludvigsson JF, Otterblad-Olausson P, Pettersson BU, et al. The Swedish personal identity number: possibilities and pitfalls in healthcare and medical research. *Eur J Epidemiol* 2009;24(11):659-67. doi: 10.1007/s10654-009-9350-y [published Online First: 2009/06/09]
16. Brusselaers N, Lagergren J. The Charlson Comorbidity Index in Registry-based Research. *Methods Inf Med* 2017;56(5):401-06. doi: 10.3414/ME17-01-0051 [published Online First: 2017/01/01]

17. Cutler SJ, Ederer F. Maximum utilization of the life table method in analyzing survival. *J Chronic Dis* 1958;8(6):699-712. doi: 10.1016/0021-9681(58)90126-7 [published Online First: 1958/12/01]
18. Kemi NA, Eskuri M, Pohjanen VM, et al. Histological assessment of stromal maturity as a prognostic factor in surgically treated gastric adenocarcinoma. *Histopathology* 2019;75(6):882-89. doi: 10.1111/his.13934 [published Online First: 2019/06/08]
19. Kemi N, Eskuri M, Ikalainen J, et al. Tumor Budding and Prognosis in Gastric Adenocarcinoma. *Am J Surg Pathol* 2019;43(2):229-34. doi: 10.1097/PAS.0000000000001181 [published Online First: 2018/10/20]
20. Kemi N, Eskuri M, Herva A, et al. Tumour-stroma ratio and prognosis in gastric adenocarcinoma. *Br J Cancer* 2018;119(4):435-39. doi: 10.1038/s41416-018-0202-y [published Online First: 2018/07/31]
21. Asplund J, Kauppila JH, Mattsson F, et al. Survival Trends in Gastric Adenocarcinoma: A Population-Based Study in Sweden. *Ann Surg Oncol* 2018 doi: 10.1245/s10434-018-6627-y [published Online First: 2018/07/11]
22. Dassen AE, Lemmens VE, van de Poll-Franse LV, et al. Trends in incidence, treatment and survival of gastric adenocarcinoma between 1990 and 2007: a population-based study in the Netherlands. *Eur J Cancer* 2010;46(6):1101-10. doi: 10.1016/j.ejca.2010.02.013 [published Online First: 2010/03/12]
23. Beyer K, Baukloh AK, Kamphues C, et al. Laparoscopic versus open gastrectomy for locally advanced gastric cancer: a systematic review and meta-analysis of randomized controlled studies. *World J Surg Oncol* 2019;17(1):68. doi: 10.1186/s12957-019-1600-1 [published Online First: 2019/04/17]
24. Yu J, Huang C, Sun Y, et al. Effect of Laparoscopic vs Open Distal Gastrectomy on 3-Year Disease-Free Survival in Patients With Locally Advanced Gastric Cancer: The CLASS-01 Randomized Clinical Trial. *JAMA* 2019;321(20):1983-92. doi: 10.1001/jama.2019.5359 [published Online First: 2019/05/29]
25. Ychou M, Boige V, Pignon JP, et al. Perioperative chemotherapy compared with surgery alone for resectable gastroesophageal adenocarcinoma: an FNCLCC and FFCD multicenter phase III trial. *J Clin Oncol* 2011;29(13):1715-21. doi: 10.1200/JCO.2010.33.0597 [published Online First: 2011/03/30]



**Table 1. Identification of the gastric cancer patients by source registry**

|                                                                          | <b>Patients<br/>Number (%)</b> |
|--------------------------------------------------------------------------|--------------------------------|
| Total                                                                    | 10,457 (100)                   |
| Cancer diagnosis in both hospital discharge registry and cancer registry | 9,421 (90.1)                   |
| Cancer diagnosis in only hospital discharge registry                     | 699 (6.7)                      |
| Cancer diagnosis in only cancer registry                                 | 265 (2.5)                      |
| Unclear tumor diagnosis and surgery code in hospital discharge registry  | 72 (0.7)                       |

**Table 2. Demographics of the surgically treated gastric cancer patients in Finland 1987 - 2016**

|                                   | <b>Patients<br/>Number (%)</b> |
|-----------------------------------|--------------------------------|
| <b>Total</b>                      | 10,457 (100)                   |
| <b>Age at surgery</b>             |                                |
| ≤50 years                         | 1,017 (9.7)                    |
| 51-60 years                       | 1,605 (15.3)                   |
| 61-70 years                       | 2,856 (27.3)                   |
| 71-80 years                       | 3,479 (33.3)                   |
| >80 years                         | 1,500 (14.3)                   |
| <b>Sex</b>                        |                                |
| Male                              | 5,695 (54.5)                   |
| Female                            | 4,762 (45.5)                   |
| <b>Education</b>                  |                                |
| ≤12 years                         | 1,960 (18.7)                   |
| 13-15 years                       | 994 (9.5)                      |
| >15 years                         | 296 (2.8)                      |
| Missing                           | 7,207 (68.9)                   |
| <b>Charlson Comorbidity Index</b> |                                |
| 0                                 | 6,731 (64.4)                   |
| 1                                 | 2,408 (23.0)                   |
| 2                                 | 892 (8.5)                      |
| 3                                 | 287 (2.7)                      |
| ≥4                                | 139 (1.3)                      |
| <b>Stage</b>                      |                                |
| Local                             | 3,208 (30.7)                   |
| Locally advanced                  | 2,146 (20.5)                   |
| Advanced                          | 2,444 (23.4)                   |
| Unclear                           | 1,995 (18.3)                   |
| Missing                           | 744 (7.1)                      |
| <b>Histology</b>                  |                                |
| Adenocarcinoma                    | 9,154 (87.6)                   |
| Other                             | 559 (5.3)                      |
| Missing                           | 744 (7.1)                      |

**Table 3. Treatment details of the gastric cancer patients included in FINEGO**

|                                               | <b>Patients<br/>Number (%)</b> |
|-----------------------------------------------|--------------------------------|
| <b>Total</b>                                  | 10,457 (100)                   |
| <b>Surgery type</b>                           |                                |
| Gastrectomy                                   | 10,140 (97.0)                  |
| Esophagectomy                                 | 145 (1.4)                      |
| Esophagogastrectomy                           | 98 (0.9)                       |
| EMR or ESD                                    | 74 (0.7)                       |
| <b>Surgical Approach</b>                      |                                |
| Open                                          | 10,270 (98.2)                  |
| Minimally invasive                            | 113 (1.1)                      |
| Not applicable                                | 74 (0.7)                       |
| <b>Neoadjuvant or perioperative treatment</b> |                                |
| None                                          | 9,248 (88.4)                   |
| Chemotherapy                                  | 984 (9.4)                      |
| Radiotherapy                                  | 55 (0.5)                       |
| Chemoradiotherapy                             | 170 (1.6)                      |
| <b>Hospital volume of gastrectomy</b>         |                                |
| 1-10 per year                                 | 2,602 (24.9)                   |
| 11-20 per year                                | 3,428 (32.8)                   |
| 21-30 per year                                | 1,963 (18.8)                   |
| 31-81 per year                                | 2,236 (21.4)                   |
| Not applicable or available                   | 228 (2.2)                      |

## Figure legends

**Figure 1.** The number of incident gastric cancers and gastric cancer deaths, according to the Finnish Cancer Registry.<sup>3</sup>

**Figure 2.** Number of surgically treated gastric cancer patients per 100,000 population between 1987 and 2016.

**Figure 3.** The median age at surgery and median annual volume of gastrectomies over time in Finland.

**Figure 4.** Kaplan-Meier curve depicting 10-year all-cause mortality in the surgically treated gastric cancer patients.

**Figure 5.** Kaplan-Meier curve depicting 10-year cancer-specific mortality in the gastric cancer patients.

1  
2  
3  
4  
5  
6  
7  
8  
9  
10  
11  
12  
13  
14  
15  
16  
17  
18  
19  
20  
21  
22  
23  
24  
25  
26  
27  
28  
29  
30  
31  
32  
33  
34  
35  
36  
37  
38  
39  
40  
41  
42  
43  
44  
45  
46  
47  
48  
49  
50  
51  
52  
53  
54  
55  
56  
57  
58  
59  
60



The number of incident gastric cancers and gastric cancer deaths, according to the Finnish Cancer Registry.

109x79mm (300 x 300 DPI)

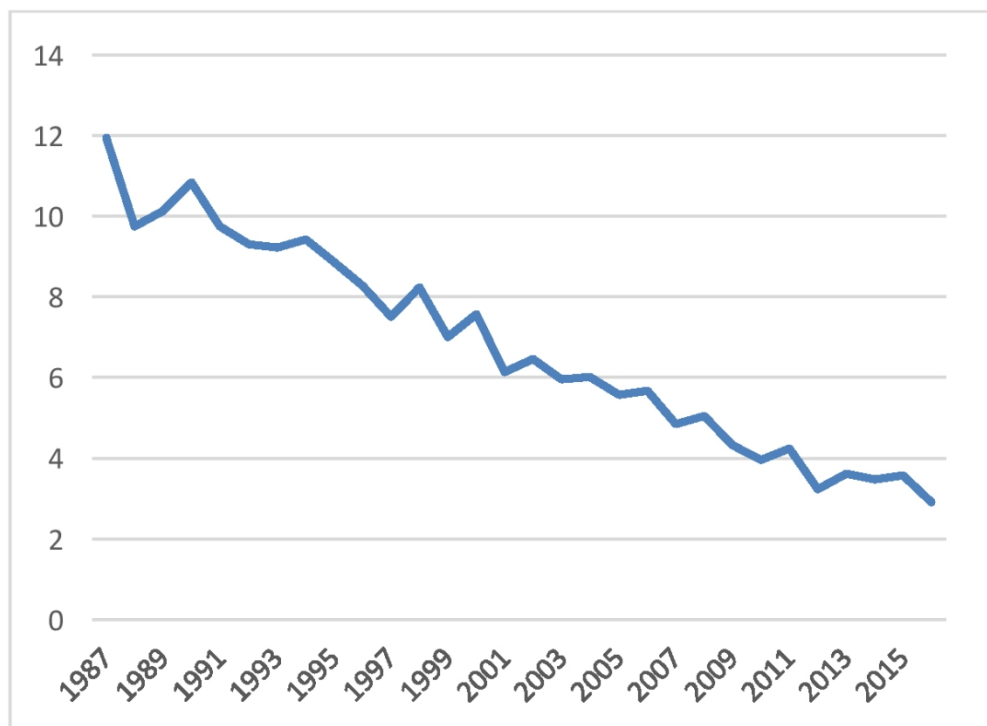

Number of surgically treated gastric cancer patients per 100,000 population between 1987 and 2016.

104x75mm (300 x 300 DPI)

1  
2  
3  
4  
5  
6  
7  
8  
9  
10  
11  
12  
13  
14  
15  
16  
17  
18  
19  
20  
21  
22  
23  
24  
25  
26  
27  
28  
29  
30  
31  
32  
33  
34  
35  
36  
37  
38  
39  
40  
41  
42  
43  
44  
45  
46  
47  
48  
49  
50  
51  
52  
53  
54  
55  
56  
57  
58  
59  
60



The median age at surgery and median annual volume of gastrectomies over time in Finland.

113x109mm (300 x 300 DPI)

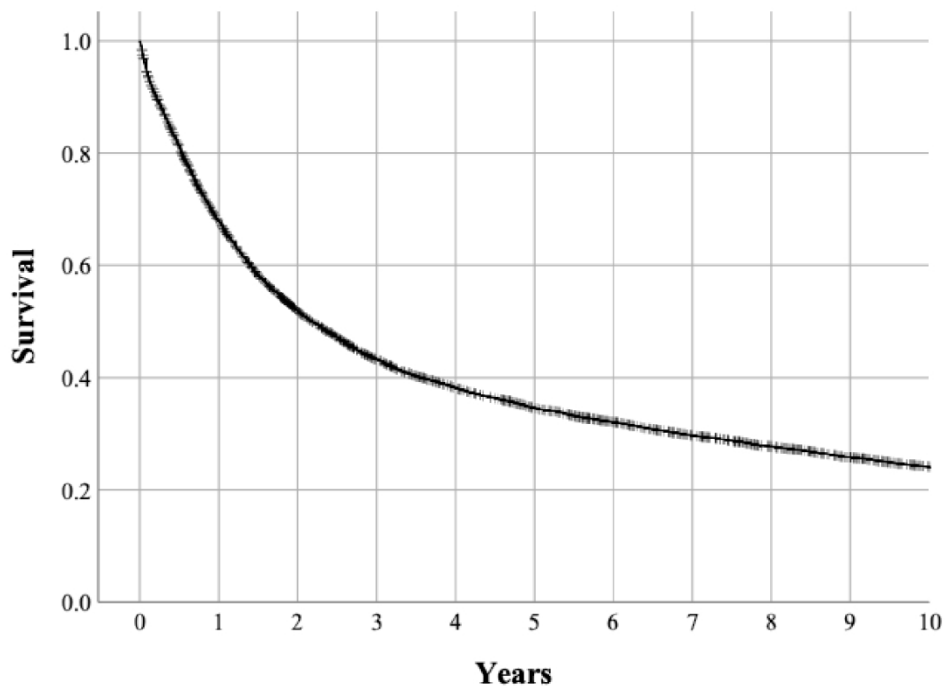

Kaplan-Meier curve depicting 10-year all-cause mortality in the surgically treated gastric cancer patients.

165x117mm (300 x 300 DPI)



1  
2  
3  
4  
5  
6  
7  
8  
9  
10  
11  
12  
13  
14  
15  
16  
17  
18  
19  
20  
21  
22  
23  
24  
25  
26  
27  
28  
29  
30  
31  
32  
33  
34  
35  
36  
37  
38  
39  
40  
41  
42  
43  
44  
45  
46  
47  
48  
49  
50  
51  
52  
53  
54  
55  
56  
57  
58  
59  
60



Kaplan-Meier curve depicting 10-year cancer-specific mortality in the gastric cancer patients.

165x117mm (300 x 300 DPI)

# FINEGO clinical data collection form

**Personal identification number:**.....

**1 Hospital:** .....

**2 Operation date:**.....

**3 Surgeon(s)** 1:..... (First name, Surname)

2: .....

3: .....

**4 Anesthesiologist(s):** 1:..... (First name, Surname)

2:.....

3:.....

**5 Operation codes:**.....

**6 Anesthesia codes:**.....

**7 Sex:**

1. Man
2. Woman

**8 Tumor localization**

1. Upper 1/3 (upper border <25 cm from incisors)
2. Middle 1/3 (upper border 25-30 cm)
3. Lower 1/3 (upper border >30 cm)
4. Cardia, Siewert type 2 (center -1 - +2cm from Z line)
5. Cardia, Siewert type 3 (center 2-5cm below Z line)
6. Stomach body
7. Stomach distal
- 999 Not clear

**9 Treatment determined in multidisciplinary meeting**

0. No

1. Yes

**10 Preop Treatment:**

0. No
1. Yes
998. Not clear

**11 Type of treatment:**

1. Chemotherapy
2. Radiation
3. Radiation+Chemotherapy

**12 Complications of neoadjuvant treatment**

0. None, completed as planned

1. Yes, with delay/reduction, why \_\_\_\_\_

2. Yes, with termination, why \_\_\_\_\_

**13 Preoperative lab****Value****Date****Not available**

|         |       |       |       |
|---------|-------|-------|-------|
| Hb:     | _____ | _____ | _____ |
| Alb:    | _____ | _____ | _____ |
| Prealb: | _____ | _____ | _____ |
| CRP     | _____ | _____ | _____ |
| BMI     | _____ | _____ | _____ |

**14 ASA Class**

\_\_\_\_\_

**15 Resection type:**  
(circle)

1. Transthoracic resection: a. Ivor-Lewis, b. McKeown
2. Transhiatal resection
3. Total gastrectomy
4. Proximal gastrectomy
5. Distal gastrectomy
6. Other \_\_\_\_\_

**16 Intent of surgical approach**

1. Open surgery
2. Hybrid thoroscopic
3. Hybrid laparoscopic
4. Totally minimally invasive (thoracoscopy + laparoscopy)
5. Totally laparoscopic (no thoracotomy/scopy)
5. Other \_\_\_\_\_

**16.1 Only minimally invasive surgery: converted open?**

0. No
1. Converted to hybrid
2. Yes

**17 Lymphadenectomy****Esophagectomy****Gastrectomy**

1. 2-field
2. Extended 2-field
3. 3-field

4. D0 lymphadenectomy
5. D1 lymphadenectomy
6. D2 lymphadenectomy
7. D3 lymphadenectomy
999. Unclear

**18 Tumor length: ..... mm****19 Substitute:**

1. Stomach
2. Small intestine
3. Colon

**20 Type of anastomosis:**

1. Handsewn:
2. Staples

**21 Location of anastomosis:**

1. Neck
2. Thorax
3. Abdomen

**22 Splenectomy:**

1. Yes: why? .....
2. No

- 1 **23 Use of energy devices** 1. Bipolar (LigaSure)  
 2 2. Ultrascision (Harmonic),  
 3 3. Hybrid (Thunderbeat)  
 4 4. Other .....  
 5 5. No  
 6
- 7 **24 Fundoplication:** 1. Before surgery: type? .....  
 8 2. During surgery: type? .....  
 9 3. No  
 10
- 11 **25 Frozen section (circle all that apply):**  
 12 1. Distal resection margin 4. None  
 13 2. Proximal resection margin 998. Not clear  
 14 3. Lymph node  
 15
- 16 **26 Jejunio-cath (feeding enterostomy):** 1. Yes  
 17 2. No  
 18
- 19 **27 Curative intended treatment:** 1. Yes  
 20 2. No (palliative resection)  
 21 3. Rescue surgery (after curative chemoradiation)  
 22 998. Not clear  
 23
- 24 **28 Duration of surgery:** ..... min (surgery start-stop)  
 25
- 26 **29 Peroperative bleeding**..... ml  
 27
- 28 For the following, count only midnights; morning Wednesday to evening Thursday = 1  
 29
- 30 **30 Days at the ICU** .....
- 31 **31 Days in respirator:** .....
- 32 **32 Days in hospital:** .....
- 33 **33 Further treatment in:**  
 34 1. Home  
 35 2. Health care center (terveyskeskus)  
 36 3. Another hospital  
 37 4. Rehabilitation center  
 38 5. Other \_\_\_\_\_  
 39
- 40 **34 Complications in 90 days after operation:** 1. No  
 41 2. Yes (fill in pages 6-10)  
 42
- 43 **35 Reoperations in 90 days after operation:** 1. No  
 44 2. Yes (fill in pages 6-10)  
 45
- 46 **36 Adjuvant treatment** 1.No  
 47 2. Chemotherapy  
 48 3. Radiotherapy  
 49
- 50 **37 Adjuvant treatment status** 1. Completed without complications  
 51 2. Complications: \_\_\_\_\_  
 52 3. Not completed, why? \_\_\_\_\_  
 53  
 54  
 55  
 56  
 57  
 58  
 59  
 60

1 **38 Proximal resection margin: ..... mm**

2  
3 **39 Distal resection margin: ..... mm**

4  
5 **40 Circumferential resection margin: ..... mm**

6  
7 **41 Histology:**

- 8 1. Adenocarcinoma
- 9 2. Squamous cell carcinoma
- 10 3. High-grade dysplasia
- 11 4. Low-grade dysplasia
- 12 5. Other \_\_\_\_\_
- 13 999 Not clear

14  
15  
16 **41.1 Laurén class:**

- 17 1. Diffuse
- 18 2. Intestinal
- 19 3. Indeterminate
- 20 999. Unavailable

16 **41.2 WHO histology classification (gastric cancer)**

- 17 1. Papillary
- 18 2. Tubular
- 19 3. Mucinous
- 20 4. Signet ring / poorly cohesive
- 21 5. Other types, which \_\_\_\_\_
- 22 999. Unavailable

23  
24  
25  
26 **42 Preoperative stage (before any treatment)**

27 **T:**

- 28 1 Tis
- 29 2 T1 – T3
- 30 3 T1
- 31 4 T2
- 32 5 T3
- 33 6 T4
- 34 7 Tx
- 35 8 T0

36  
37 **43 N:**

- 38 1 N0
- 39 2 N1
- 40 3 N2
- 41 4 N3
- 42 999 not clear

43  
44 **44 M:**

- 45 0 M0
- 46 1 MIa
- 47 2 MIb
- 48 999 Not Clear

**45 Postoperative stage (According to PAD or patient records)**

**T:**

- 1 Tis
- 2 T1 – T3
- 3 T1
- 4 T2
- 5 T3
- 6 T4
- 7 Tx
- 8 T0

**46 N:**

- 1 N0
- 2 N1
- 3 N2
- 4 N3
- 999 not clear

**47 Lymph nodes with metastasis:** ..... pcs

**48 Number of Lymph nodes examined:**..... pcs

**49 M:**

- 0 M0
- 1 MIa
- 2 MIb
- 999 Not Clear

**50 G/Differentiation:**

1. G1, well differentiated
2. G2, moderately differentiated
3. G3, poorly differentiated
4. GX, cannot be assessed

**51 Tumor stage:**

- 0 0 (pat only op)
- 1 I
- 2 IIA
- 3 IIB
- 4 III
- 5 IV
- 6 IVA
- 7 IVB
- 8 No cancer/dysplasia
- 9 Complete response after neo
- 999 not clear

**52 Micr radically:**

|               |                    |               |
|---------------|--------------------|---------------|
| 0 No          | <b>54 R0/R1/R2</b> | 1 R0          |
| 1 Yes         |                    | 2 R1          |
| 999 Not clear |                    | 3 R2          |
|               |                    | 999 not clear |

**53 Macr radically:**

- 0 No
- 1 Yes
- 999 Not Clear

**55 Becker regression grade:**

|                           |                        |
|---------------------------|------------------------|
| 1. No tumor left (1a)     | 4. >50% tumor left (3) |
| 2. <10% tumor left (1b)   |                        |
| 3. <10-50% tumor left (2) | 999. Not applicable    |

## COMPLICATIONS

**56 Complications during 30 days after surgery (circle) and 30-90 days after surgery (square)  
-Mark the main categories and all sub-categories that apply!**

1. Pulmonary complications
  - a. Pneumonia
  - b. Pleural effusion requiring additional drainage procedure
  - c. Pneumothorax requiring treatment
  - d. Atelectasis mucous plugging requiring bronchoscopy
  - e. Respiratory failure requiring intubation
  - f. Acute respiratory distress syndrome (ARDS)
  - g. Acute aspiration
  - h. Tracheobronchial injury
  - i. Chest tube for air leak over 10 days postop
  
2. Cardiac complications
  - a. Cardiac arrest requiring CPR
  - b. Myocardial infarction (Troponin + ECG)
  - c. Atrial dysrhythmia requiring treatment
  - d. Ventricular dysrhythmia requiring treatment
  - e. Congestive heart failure requiring treatment
  - f. Pericarditis requiring treatment

- 1 3. Gastrointestinal complications
- 2
- 3 a. Esophagoenteric leak from anastomosis or conduit necrosis
- 4
- 5 i. Type 1: local defect requiring no change in therapy, treated medically or diet
- 6
- 7 ii. Type 2: requiring intervention, no surgery (radiology, stent, bedside opening)
- 8
- 9 iii. Type 3: Defect requiring surgery
- 10
- 11
- 12 b. Conduit necrosis/failure
- 13
- 14 i. Type 1: Focal conduit necrosis identified endoscopically, causes additional
- 15 monitoring or non-surgical therapy
- 16
- 17 ii. Type 2: Focal conduit necrosis, treated by surgical therapy but not diversion
- 18
- 19 iii. Type 3: Conduit necrosis requiring conduit resection and diversion
- 20
- 21
- 22
- 23 c. Ileus preventing or delaying enteral feeding
- 24
- 25 d. Small bowel obstruction
- 26
- 27 e. Feeding J-tube complication
- 28
- 29 f. Pyloromyotomy/pyloroplasty complication
- 30
- 31 g. Clostridium infection
- 32
- 33 h. GI bleeding requiring intervention or transfusion
- 34
- 35 i. Delayed conduit emptying requiring intervention or delaying discharge, or requiring
- 36 nasogastric tube >7 days
- 37
- 38
- 39
- 40
- 41 j. Pancreatitis
- 42
- 43 k. Pancreatic fistula
- 44
- 45 l. Liver dysfunction
- 46
- 47 m. Biliary leakage
- 48
- 49
- 50
- 51
- 52
- 53
- 54
- 55
- 56
- 57
- 58
- 59
- 60



- 1 4. Urologic
- 2
- 3 a. Acute renal failure (doubling of baseline creatinine)
- 4
- 5 b. Acute renal failure requiring dialysis
- 6
- 7 c. Urinary tract infection
- 8
- 9
- 10 d. Urinary retention requiring re-insertion of catheter, delaying discharge, or discharge with
- 11 catheter
- 12
- 13
- 14
- 15
- 16
- 17
- 18
- 19 5. Thromboembolic
- 20
- 21 a. DVT (ultrasound or angio verified)
- 22
- 23 b. Pulmonary embolism
- 24
- 25 c. Stroke (defined by CT or similar)
- 26
- 27
- 28 d. Peripheral thrombophlebitis (clinically verified)
- 29
- 30
- 31
- 32
- 33
- 34
- 35 6. Neurologic / psychiatric
- 36
- 37 a. Recurrent nerve paresis (mark: A unilateral, B bilateral)
- 38
- 39 i. Type 1: Transient injury, requires no other therapy than dietary modification
- 40
- 41 ii. Type 2: Injury requiring elective surgery (thyroplasty or medialization
- 42 procedure)
- 43
- 44 iii. Type 3: Injury requiring acute surgery due to aspiration or respiratory issues
- 45
- 46
- 47
- 48
- 49 b. Other neurologic injury
- 50
- 51 c. Acute delirium
- 52
- 53 d. Delirium tremens (alcohol withdrawal symptom)
- 54
- 55
- 56
- 57
- 58
- 59
- 60

- 1  
2  
3  
4  
5  
6  
7  
8  
9  
10  
11  
12  
13  
14  
15  
16  
17  
18  
19  
20  
21  
22  
23  
24  
25  
26  
27  
28  
29  
30  
31  
32  
33  
34  
35  
36  
37  
38  
39  
40  
41  
42  
43  
44  
45  
46  
47  
48  
49  
50  
51  
52  
53  
54  
55  
56  
57  
58  
59  
60
7. Infection
    - a. Wound infection requiring opening wound or antibiotics
    - b. Central line infection requiring removal or antibiotics
    - c. Intra-abdominal abscess
    - d. Intrathoracic abscess
    - e. Sepsis
    - f. Other infection requiring antibiotics, what .....
  8. Wound/diaphragm
    - a. Thoracic wound dehiscence
    - b. Acute abdominal wall dehiscence / hernia
    - c. Acute diaphragmatic hernia
  9. Other
    - a. Chyle leak (Mark: A. <1 liter per day, B >1 liter per day)
      - i. Type 1: requires dietary modifications, but not totally parenteral nutrition
      - ii. Type 2: requires totally parenteral nutrition
      - iii. Type 3: requires surgery or other intervention (chest drains not included)
    - b. Reoperation for reason other than bleeding, anastomotic leak or conduit necrosis, reason.....
    - c. Multiple organ failure

**57 Clavien-Dindo classification for complications (only the most severe grade to be ticked)**

0. No complications
1. Grade 1 (Any deviation from postoperative course, including antiemetics, antipyretics, analgetics, diuretics and electrolytes and physiotherapy or opening the wound bedside)\*
2. Grade 2 (Blood transfusion, total parenteral nutrition or pharmacological treatment needed other than I)
3. Grade 3 (Surgical, endoscopic or radiological intervention)
4. Grade 4 (Life-threatening complications requiring IC/ICU-management, or stroke (not TIA) or any brain hemorrhage)
5. Grade 5 (Death of a patient)

**58 REOPERATIONS****Reoperation 1**

Days from primary operation: \_\_\_\_\_

Reason for operation: \_\_\_\_\_

Result: \_\_\_\_\_

**Reoperation 2**

Days from primary operation: \_\_\_\_\_

Reason for operation: \_\_\_\_\_

Result: \_\_\_\_\_

**Reoperation 3**

Days from primary operation: \_\_\_\_\_

Reason for operation: \_\_\_\_\_

Result: \_\_\_\_\_

# BMJ Open

## Cohort Profile: gastric cancer in the population-based, Finnish National Esophago-Gastric Cancer Cohort (FINEGO) study.

|                                 |                                                                                                                                                                                                                                                                                                                                                                                                                                                                                                                                                                                                                                                                                                                                                                                                                                                                                                                                                                                                                                                                                                                                                                                                                                                                                                                                                                                                                                                                                                                                                                                                                               |
|---------------------------------|-------------------------------------------------------------------------------------------------------------------------------------------------------------------------------------------------------------------------------------------------------------------------------------------------------------------------------------------------------------------------------------------------------------------------------------------------------------------------------------------------------------------------------------------------------------------------------------------------------------------------------------------------------------------------------------------------------------------------------------------------------------------------------------------------------------------------------------------------------------------------------------------------------------------------------------------------------------------------------------------------------------------------------------------------------------------------------------------------------------------------------------------------------------------------------------------------------------------------------------------------------------------------------------------------------------------------------------------------------------------------------------------------------------------------------------------------------------------------------------------------------------------------------------------------------------------------------------------------------------------------------|
| Journal:                        | <i>BMJ Open</i>                                                                                                                                                                                                                                                                                                                                                                                                                                                                                                                                                                                                                                                                                                                                                                                                                                                                                                                                                                                                                                                                                                                                                                                                                                                                                                                                                                                                                                                                                                                                                                                                               |
| Manuscript ID                   | bmjopen-2020-039574.R2                                                                                                                                                                                                                                                                                                                                                                                                                                                                                                                                                                                                                                                                                                                                                                                                                                                                                                                                                                                                                                                                                                                                                                                                                                                                                                                                                                                                                                                                                                                                                                                                        |
| Article Type:                   | Cohort profile                                                                                                                                                                                                                                                                                                                                                                                                                                                                                                                                                                                                                                                                                                                                                                                                                                                                                                                                                                                                                                                                                                                                                                                                                                                                                                                                                                                                                                                                                                                                                                                                                |
| Date Submitted by the Author:   | 08-Sep-2020                                                                                                                                                                                                                                                                                                                                                                                                                                                                                                                                                                                                                                                                                                                                                                                                                                                                                                                                                                                                                                                                                                                                                                                                                                                                                                                                                                                                                                                                                                                                                                                                                   |
| Complete List of Authors:       | <p>Kauppila, Joonas; Karolinska Institutet Department of Molecular Medicine and Surgery, ; Oulun Yliopisto Laaketieteellisen tiedekunta, Cancer and Translational Medicine Research Unit</p> <p>Ohtonen, Pasi; Pohjois-Pohjanmaan Sairaanhoidopiiri, Department of Surgery</p> <p>Rantanen, Tuomo; Kuopion yliopistollinen sairaala, Department of Surgery; Etelä-Pohjanmaan keskussairaala, Department of Surgery</p> <p>Tyrväinen, Tuula; Tampereen yliopistollinen sairaala, Department of Gastroenterology and Alimentary Tract Surgery</p> <p>Toikkanen, Vesa; Tampereen yliopistollinen sairaala, Department of Cardiothoracic Surgery, Heart Center</p> <p>Pääaho, Minna; Oulun Yliopisto Laaketieteellisen tiedekunta, Surgery Research Unit</p> <p>Valtola, Antti; Kuopion yliopistollinen sairaala, Department of Surgery</p> <p>Räsänen, Jari; Helsingin ja Uudenmaan sairaanhoidopiiri, Department of General Thoracic and Oesophageal Surgery</p> <p>Kallio, Raija; Oulun Yliopisto Laaketieteellisen tiedekunta, Department of Oncology</p> <p>Sihvo, Eero; Keski Suomen Sairaanhoidopiiri, Department of Surgery</p> <p>Saarnio, Juha; Pohjois-Pohjanmaan Sairaanhoidopiiri, Department of Surgery</p> <p>Karttunen, Tuomo; Oulu University Hospital and University of Oulu, Medical Research Center</p> <p>Pohjanen, Vesa-Matti</p> <p>Ristimäki, Ari; Helsingin ja Uudenmaan sairaanhoidopiiri, Department of Pathology</p> <p>Laine, Simo; Varsinais-Suomen Sairaanhoidopiirin Kuntayhtymä, Department of Surgery</p> <p>Kokkola, Arto; Helsingin ja Uudenmaan sairaanhoidopiiri, Department of Surgery</p> |
| <b>Primary Subject Heading</b>: | Surgery                                                                                                                                                                                                                                                                                                                                                                                                                                                                                                                                                                                                                                                                                                                                                                                                                                                                                                                                                                                                                                                                                                                                                                                                                                                                                                                                                                                                                                                                                                                                                                                                                       |
| Secondary Subject Heading:      | Oncology, Gastroenterology and hepatology                                                                                                                                                                                                                                                                                                                                                                                                                                                                                                                                                                                                                                                                                                                                                                                                                                                                                                                                                                                                                                                                                                                                                                                                                                                                                                                                                                                                                                                                                                                                                                                     |
| Keywords:                       | SURGERY, Gastrointestinal tumours < ONCOLOGY, Gastrointestinal tumours < GASTROENTEROLOGY, GASTROENTEROLOGY, Adult oncology < ONCOLOGY                                                                                                                                                                                                                                                                                                                                                                                                                                                                                                                                                                                                                                                                                                                                                                                                                                                                                                                                                                                                                                                                                                                                                                                                                                                                                                                                                                                                                                                                                        |

1  
2  
3  
4  
5  
6  
7  
8  
9  
10  
11  
12  
13  
14  
15  
16  
17  
18  
19  
20  
21  
22  
23  
24  
25  
26  
27  
28  
29  
30  
31  
32  
33  
34  
35  
36  
37  
38  
39  
40  
41  
42  
43  
44  
45  
46  
47  
48  
49  
50  
51  
52  
53  
54  
55  
56  
57  
58  
59  
60



SCHOLARONE™  
Manuscripts



I, the Submitting Author has the right to grant and does grant on behalf of all authors of the Work (as defined in the below author licence), an exclusive licence and/or a non-exclusive licence for contributions from authors who are: i) UK Crown employees; ii) where BMJ has agreed a CC-BY licence shall apply, and/or iii) in accordance with the terms applicable for US Federal Government officers or employees acting as part of their official duties; on a worldwide, perpetual, irrevocable, royalty-free basis to BMJ Publishing Group Ltd ("BMJ") its licensees and where the relevant Journal is co-owned by BMJ to the co-owners of the Journal, to publish the Work in this journal and any other BMJ products and to exploit all rights, as set out in our [licence](#).

The Submitting Author accepts and understands that any supply made under these terms is made by BMJ to the Submitting Author unless you are acting as an employee on behalf of your employer or a postgraduate student of an affiliated institution which is paying any applicable article publishing charge ("APC") for Open Access articles. Where the Submitting Author wishes to make the Work available on an Open Access basis (and intends to pay the relevant APC), the terms of reuse of such Open Access shall be governed by a Creative Commons licence – details of these licences and which [Creative Commons](#) licence will apply to this Work are set out in our licence referred to above.

Other than as permitted in any relevant BMJ Author's Self Archiving Policies, I confirm this Work has not been accepted for publication elsewhere, is not being considered for publication elsewhere and does not duplicate material already published. I confirm all authors consent to publication of this Work and authorise the granting of this licence.

1  
2  
3 **Cohort Profile: gastric cancer in the population-based, Finnish National**  
4  
5  
6 **Esophago-Gastric Cancer Cohort (FINEGO) study**  
7  
8  
9  
10  
11

12 **Authors:** Joonas H. Kauppila<sup>1,2</sup>, Pasi Ohtonen<sup>1</sup>, Tuomo Rantanen<sup>3</sup>, Tuula Tyrväinen<sup>4</sup>, Vesa  
13 Toikkanen<sup>5</sup>, Minna Pääaho<sup>1</sup>, Antti Valtola<sup>3</sup>, Jari V. Räsänen<sup>6</sup>, Raija Kallio<sup>7</sup>, Eero Sihvo<sup>8</sup>, Juha  
14 Saarnio<sup>1</sup>, Tuomo J. Karttunen<sup>9</sup>, Vesa-Matti Pohjanen<sup>9</sup>, Ari Ristimäki<sup>10</sup>, Simo Laine<sup>11</sup>, Arto  
15 Kokkola<sup>12</sup>  
16  
17  
18  
19  
20  
21  
22  
23  
24  
25

26 **Affiliations:**

27  
28 <sup>1</sup>Surgery Research Unit, Medical Research Center Oulu, Oulu University Hospital and  
29 University of Oulu, Oulu, Finland;  
30  
31

32 <sup>2</sup>Upper Gastrointestinal Surgery, Department of Molecular Medicine and Surgery, Karolinska  
33 Institutet and Karolinska University Hospital, Stockholm, Sweden;  
34  
35

36  
37 <sup>3</sup>Department of Surgery, University of Eastern Finland and Kuopio University Hospital,  
38 Finland;  
39  
40

41 <sup>4</sup>Department of Gastroenterology and Alimentary Tract Surgery, Tampere University  
42 Hospital, Tampere, Finland;  
43  
44

45  
46 <sup>5</sup>Department of Cardiothoracic Surgery, Heart Center, Tampere University Hospital and  
47 University of Tampere, Tampere, Finland;  
48  
49

50  
51 <sup>6</sup>Department of General Thoracic and Oesophageal Surgery, Heart and Lung Centre,  
52 University of Helsinki and Helsinki University Hospital, Helsinki, Finland;  
53  
54

55  
56 <sup>7</sup>Department of Oncology and Haematology, Oulu University Hospital, Oulu, Finland;  
57

58 <sup>8</sup>Department of Surgery, Central Finland Central Hospital, Jyväskylä, Finland;  
59

60 <sup>9</sup>Cancer and Translational Medicine Research Unit, Medical Research Center, University of

1  
2  
3 Oulu and Oulu University Hospital, Oulu, Finland;  
4

5 <sup>10</sup>Department of Pathology, HUSLAB, and Applied Tumor Genomics Research Program,  
6  
7 Research Programs Unit, University of Helsinki and Helsinki University Hospital , Helsinki ,  
8  
9 Finland;  
10  
11

12 <sup>11</sup>The Division of Digestive Surgery and Urology, Turku University Hospital, Turku, Finland;  
13  
14 and  
15

16 <sup>12</sup>Department of Surgery, University of Helsinki and Helsinki University Hospital, Helsinki,  
17  
18 Finland.  
19  
20

21  
22  
23  
24  
25 **Corresponding author:** Joonas H. Kauppila, Surgery Research Unit, MRC Oulu, Oulu  
26  
27 University Hospital and University of Oulu, P.O. Box 5000, 90014 Oulu, Finland and Upper  
28  
29 Gastrointestinal Surgery, Department of Molecular Medicine and Surgery, Karolinska  
30  
31 Institutet and Karolinska University Hospital, Stockholm, Sweden. Email:  
32  
33 [Joonas.kauppila@oulu.fi](mailto:Joonas.kauppila@oulu.fi)  
34  
35  
36  
37  
38  
39  
40

41 **Word count: 3048**  
42  
43  
44  
45  
46  
47  
48  
49  
50  
51  
52  
53  
54  
55  
56  
57  
58  
59  
60



## Abstract

### Purpose

The Finnish National Esophago-Gastric Cancer Cohort (FINEGO) was established with the aim of identifying factors that could contribute to improved outcomes in oesophago-gastric cancer. The aim of this study is to describe the gastric cancer patients included in FINEGO

### Participants

A total of 10,457 patients with gastric cancer or tumour diagnosis in the Finnish Cancer Registry or the Finnish Patient Registry during 1987-2016 were included in the cohort, with follow-up from Causes of Death registry until December 31<sup>st</sup>, 2016. All of the participants were at least 18 years of age, and had undergone either resectional or endoscopic mucosal surgery with curative or palliative intent.

### Findings to date

Of the 10,457 patients, 90.1% were identified to have cancer in both cancer and patient registries. In all, the median age was 70 at the time of surgery, 54.5% of the patients were male and 64.4% had no comorbidities. Education data was available for 31.1% of the patients, of whom the majority had had <12 years of formal education. Of the 7,798 with cancer staging data available, 41.1% had a local cancer. Adenocarcinoma was the most common (94.2%) histological type. Almost all patients underwent open gastrectomy and 214% in hospitals with annual volume of more than 30 gastrectomies per year. A total of 8,561 deaths occurred during the study period, of which 6,474 were due to oesophago-gastric cancers. The 5-year survival was 34.6% and 5-year cancer-specific survival was 39.7%.

### Future plans

1  
2  
3 The data in FINEGO can be currently used for registry-based research but is being expanded  
4  
5 by data extraction from patient records and scanning of histological samples from the Finnish  
6  
7 biobanks. Initially, we are planning on studies on the national trends in treatment and  
8  
9 mortality, and studies on the demographic factors and their influence on survival.  
10  
11  
12  
13  
14  
15  
16  
17  
18  
19  
20  
21  
22  
23  
24  
25  
26  
27  
28  
29  
30  
31  
32  
33  
34  
35  
36  
37  
38  
39  
40  
41  
42  
43  
44  
45  
46  
47  
48  
49  
50  
51  
52  
53  
54  
55  
56  
57  
58  
59  
60

For peer review only

## Article Summary

### Strengths and limitations of this study:

- The main strength of the study is the population-based design with complete and accurate ascertainment of all patients diagnosed with gastric cancer in Finland, counteracting selection bias.
- The follow-up of participants is complete.
- The main limitations are the exclusion of patients not undergoing surgery and registry information lag of up to two years.
- Some registry-based variables, such as laparoscopic surgery or neoadjuvant therapy are of questionable quality and should be interpreted cautiously before validation studies.
- The dataset will be complemented with patient records and histological slides collection to allow a wide variety of research questions.

**Funding statement:** This work is supported by research grants from the Sigrid Jusélius Foundation (Sigrid Juséliuksen Säätiö), The Finnish Cancer Foundation (Syöpäsäätiö), Päivikki and Sakari Sohlberg Foundation and Orion Research Foundation (Orionin Tutkimussäätiö). The funding sources have no role in the design and conduct of the study; collection, management, analysis, and interpretation of the data; preparation, review, or approval of the manuscript; or decision to submit the study protocol for publication.

**Competing interests statement:** The authors state no potential competing interests.

**Author contributions:**

Study idea: JHK; Concept and design: JHK, PO, TR, TT, VT, MP, AV, JVR, RK, JS, ES, TJK, VMP, AR, SL, AK; Data collection tools development: JHK, PO, TR, MP, JVR, ES, TJK, VMP, SL, AK; Obtained permissions: JHK, MP; Obtained funding: JHK; Statistical analysis: JHK, PO; Interpretation: JHK, PO, TR, TT, VT, MP, AV, JVR, RK, JS, ES, TJK, VMP, AR, SL, AK; Drafted the manuscript: JHK; Critical revision for intellectual content and accepted submitted version JHK, PO, TR, TT, VT, MP, AV, JVR, RK, JS, ES, TJK, VMP, AR, SL, AK; Guarantor: JHK.

**Data sharing statement:**

All data from FINEGO presented in this article are stored by the research group on safe servers at University of Oulu, Finland, and handled confidentially. Currently, only the research team has access to the data. Data access to collaborators can be granted given that relevant government and health officials approve the collaborative study. Researchers interested in collaboration, for example joint efforts combining the dataset with other population-based studies, are welcome to contact Joonas Kauppila (joonas.kauppila@oulu.fi), principal investigator.

## Introduction

Gastric cancer is the third leading cause of cancer death worldwide.<sup>1</sup> Gastric cancer incidence is slowly decreasing,<sup>2</sup> also in Finland (Figure 1),<sup>3</sup> but the incident cancers are often diagnosed at a late stage.<sup>4</sup> The dominant histologic type is adenocarcinoma, and only less than 5% of all gastric cancers represent other histological types.<sup>5</sup> The standard treatment of gastric cancer is surgery, in certain stages accompanied by neoadjuvant or perioperative therapy.<sup>4,6</sup> Even after curative surgery, gastric cancers have poor survival.<sup>4,7</sup>

However, there are many unclear topics and gaps of knowledge in the treatment of gastric cancer, such as whether high hospital or surgeon volumes, or oncologic treatment improve gastric cancer survival,<sup>8</sup> whether certain anastomotic techniques are associated with less postoperative complications,<sup>9,10</sup> and whether Siewert II gastric cardia cancer should be resected by oesophagectomy or gastrectomy,<sup>11</sup> to name a few. The population-based nationwide cohort would be the ideal study design to evaluate these questions,<sup>12</sup> as randomized controls would be either unfeasible, or would need to include a very large amount of patients.

The Finnish registry data is known to be of high quality with high completeness.<sup>13</sup> To facilitate surgical research with appropriate in-depth clinical variables, we started a national collaborative with the aim to create a population-based cohort on gastric cancer in Finland with extensive data collection from the nationwide registries and patient records. The collaborative and the cohort was named The Finnish National Esophago-Gastric Cancer Cohort (FINEGO).<sup>14</sup>

In this cohort profile, we describe the registry data on 10,457 gastric cancer patients included in FINEGO. Esophageal cancer patients are described in a separate study.

## Cohort description

FINEGO is a population-based, nationwide, retrospective cohort study of all surgically treated esophageal and gastric cancer patients in Finland since 1987. Senior surgeons, oncologists, pathologists and statisticians are involved in the collaborative group, representing the six Finnish hospitals and the related universities actively participating in surgical treatment and research of esophago-gastric cancer.

The inclusion criteria of the study were:

- Age at least 18 years at the time of cancer diagnosis
- Primary cancer of epithelial origin in the oesophagus, cardia, or stomach
- Surgical treatment given for cancer, including all types of surgery or endoscopic resection

However, as there is a possibility of misclassification in the registries, the data collection was somewhat broader. All cancers of any origin were included during the registry data collection to avoid excluding misclassified patients. Furthermore, patients with unclear tumor diagnoses undergoing surgical resection were also included to reduce selection bias. All patients without surgically treatment were excluded from the cohort.

For this manuscript, only gastric cancers are included.

### Data sources

The data were collected from the Finnish Cancer Registry, Finnish Patient Registry and Statistics Finland. The immutable, 11-digit personal identification number assigned to each

1  
2  
3 resident in the country was used to combine the registry data.<sup>15</sup> Personal identity number  
4  
5 contains information on date of birth and sex, and was used to derive age information.  
6  
7

8 *The Finnish Cancer Registry* provided data on incident cancers, including topography or  
9  
10 cancer location, histology, cancer stage (local, locally advanced, advanced), and whether  
11  
12 chemotherapy, radiotherapy, or surgical treatment was given.  
13  
14

15  
16 *The Finnish Patient Registry* has data on admission and discharge dates, operations codes,  
17  
18 diagnosis codes and the hospital or healthcare unit identification number where these codes  
19  
20 were assigned. These data were used to identify incident cancers and patients receiving  
21  
22 surgical treatment, as well as for calculating comorbidities and annual hospital volume of  
23  
24 gastric cancer surgery. Comorbidities were defined using the well-validated Charlson  
25  
26 Comorbidity Index (CCI) not including gastric cancer, by retrieving diagnoses before index  
27  
28 admission for surgery.<sup>16</sup> Neoadjuvant therapy codes were used to find patients undergoing  
29  
30 neoadjuvant or perioperative treatment. The annual hospital volume was assessed by  
31  
32 calculating the number of gastrectomies for the study patients during the year of surgery in the  
33  
34 hospital the patient was operated in.  
35  
36  
37  
38

39  
40 *Statistics Finland* provided data on the dates and causes of death, which are 100% and >99%  
41  
42 complete, respectively. Education registry had information on education starting from year  
43  
44 1970 and it was used for obtaining the highest education grade of the patients.  
45  
46  
47  
48  
49

50  
51 Incident cancers were identified from cancer registry records and patient registry, using the  
52  
53 relevant topographic in the cancer registry, and ICD-9 and ICD-10 codes in the patient  
54  
55 registry.<sup>14</sup> The patient had to have cancer diagnosis in either of the registries, to ensure  
56  
57 complete identification. Surgical codes concerning gastrectomy or endoscopic mucosal  
58  
59  
60

1  
2  
3 surgery were then searched in the *Patient Registry* to identify patients undergoing surgical  
4  
5 treatment.<sup>14</sup>  
6  
7  
8  
9

## 10 11 Statistics

12  
13  
14 The demographic factors were tabulated and Kaplan-Meier curves were calculated according  
15  
16 to the life table method.<sup>17</sup> The endpoints were all-cause mortality and cancer-specific  
17  
18 mortality, defined as mortality for esophago-gastric cancers to reduce misclassification bias,  
19  
20 which is common for especially gastric cardia cancer.<sup>18</sup>  
21  
22  
23  
24  
25  
26  
27

## 28 Permissions and registration

29  
30  
31 The study has been approved by ethical committee in Northern Ostrobothnia (EETMK  
32  
33 115/2016), The National Institute for Health and Welfare (THL/169/5.05.00), Statistics  
34  
35 Finland (TK-53-1478-17) and the Office of the Data Protection Ombudsman (Dnro  
36  
37 506/402/17), Finland. Relevant local permissions and registrations were obtained from all the  
38  
39 21 hospital districts. Individual informed consent will not be sought from the patients whose  
40  
41 data are used in this observational study. Obtaining the informed consent has been waived by  
42  
43 the Finnish law. The study will be conducted in accordance with the Declaration of Helsinki.  
44  
45  
46  
47  
48  
49  
50

## 51 Patient and public involvement

52  
53  
54 Patients or public were not involved in the development of the research question and study  
55  
56 design or conducting the present study.  
57  
58  
59  
60



## Findings to date

A total of 10,457 patients were surgically treated for gastric cancer in Finland during years 1987-2016. This is almost 40% more than the initial estimate of 7,500 patients.<sup>14</sup> As seen in Figure 2, majority of the patients were operated during the first half of the study period, beginning with almost 12 operated gastric cancer patients per 100,000 population in 1987 and linearly declining to less than 2 / 100,000 population in the whole country in 2016. According to the official statistics, also the number of incident gastric cancer cases and deaths decreased during the study period (Figure 1).<sup>3</sup>

The vast majority of patients (90.1%) were identified to have cancer in both patient and cancer registry, while 7.4% had cancer or unclear tumor diagnosis in the patient registry only, and 2.5% had cancer diagnosis in the cancer registry only (Table 1).

Table 2 summarizes the demographic variables of the patients. The median age at the time of operation during the whole study period was 70.0 years, and remained quite constant over time (Figure 3). The proportion of males was 54.5% (n=5,695). Education data was lacking in 68.9% (7,207) of the patients, and of those with data available, the majority had less than 12 years of formal education. Most of the patients had CCI of 0 at the time of operation (n=6,731, 64.6%), while 2,408 (23.0%) had CCI of 1 and 1,318 (12.6%) had CCI of 2 or more.

Cancer staging was available for 7,798 (74.6%) patients. Of these 7,798 patients, 41.1% had local cancer, 27.5% had locally advanced cancer, and 31.3% had advanced cancer according to the cancer registry. Histology was available for 9,713 patients, of whom the majority had adenocarcinoma (94.2%). More accurate definition of histomorphology was not reliably possible using registry data.

1  
2  
3 The details on treatment are summarized in Table 3. The absolute majority underwent  
4  
5  
6  
7  
8  
9  
10  
11  
12  
13  
14  
15  
16  
17  
18  
19  
20  
21  
22  
23  
24  
25  
26  
27  
28  
29  
30  
31  
32  
33  
34  
35  
36  
37  
38  
39  
40  
41  
42  
43  
44  
45  
46  
47  
48  
49  
50  
51  
52  
53  
54  
55  
56  
57  
58  
59  
60

The details on treatment are summarized in Table 3. The absolute majority underwent gastrectomy (n=10,140, 97.0%), including total and partial gastrectomies, followed by esophagectomy, combined esophagogastrectomy, and EMR or ESD, respectively. Minimally invasive (laparoscopic) approach was used in only 113 patients. Neoadjuvant or perioperative treatment was given to 1,209 (11.6%) patients, with chemotherapy alone being the most common modality. The use of neoadjuvant or perioperative treatment increased from 8.3% in 1987-2006 to 24.6% in 2007-2016.

Median annual hospital volume only decreased over time from over 20 gastrectomies per year to around 15 gastrectomies per year during the study period (Figure 3), despite the strong decrease in the total number of gastrectomies in the country (Figure 2). Of all patients, 2,602 (24.9%) were operated in hospitals performing 1 to 10 gastrectomies per year, and 2,236 (21.4%) in hospitals performing 31 to 81 gastrectomies per year (Table 3).

There were 8,561 deaths during the study period, of which 6,474 were due to oesophago-gastric cancer according to the causes of death registry. Of the 10,457 patients, 67.9% were alive at 1 year after surgery, 43.3 were alive at 3 years after surgery, 34.6% were alive at 5 years after surgery, and 24.1% at 10 years after surgery (Figure 4). For cancer-specific survival, the respective figures were 69.7% at 1 year after surgery, 46.8 at 3 years after surgery, 39.7% were alive at 5 years after surgery, and 34.5% at 10 years after surgery (Figure 5).

### Future plans

In its present form, the FINEGO cohort can be used for conducting epidemiological research including the above registry-based variables. The future studies using this data include a study on the trends of gastric cancer over time in Finland, as well as examining the influence of age,

1  
2  
3 sex, and comorbidities on the mortality of gastric cancer patients. Annual hospital volume in  
4  
5 relation to short- and long-term mortality will also be assessed.  
6  
7

8  
9 As the registry data is to be combined with the data currently being extracted from the  
10  
11 individual patient records collected from all hospitals in Finland, we plan to validate the data  
12  
13 reported by the registries against patient records. At the time of writing, approximately half of  
14  
15 the gastric cancer patient records have been identified or collected, the minority of which have  
16  
17 been declared as destroyed. The assessment of patient records for clinical variables will allow  
18  
19 accurate estimation of the proportion missing records in the future. The variables extracted  
20  
21 from the patient records are presented in Supplementary file 1. Furthermore, misclassification  
22  
23 of cardia cancer diagnosis in the registries will be examined in relation to  
24  
25 oesophagogastroscopy findings. After completion of clinical data retrieval from the patient  
26  
27 records and pathology, we are planning a number of studies to assess postoperative  
28  
29 complications and surgical factors such as anastomotic technique in relation to complications,  
30  
31 as well as validation of previously identified histological risk factors of long-term gastric  
32  
33 cancer mortality.<sup>19-21</sup> The collection and evaluation of biobank samples for histological  
34  
35 diagnoses is also gaining speed. The first update and extension of the cohort with five more  
36  
37 years of registry data and consequent patient records and samples is planned for year 2022.  
38  
39  
40  
41  
42  
43  
44  
45  
46  
47  
48  
49  
50  
51  
52  
53  
54  
55  
56  
57  
58  
59  
60

## Strengths and limitations

This cohort profile describes the 10,457 gastric cancer patients included in initial period 1987-2016 of the nationwide, population-based retrospective FINEGO study.

There are multiple strengths to the FINEGO cohort. The large size of the cohort will make it one of the largest gastric cancer studies with patient records data and histological samples. Its population-based nationwide design together with patient identification from two separate, highly complete nationwide registries eliminates selection bias, and the planned collection and re-review of patient records and histological slides will be done to eliminate misclassification between gastric and oesophageal cancer. For mortality outcomes, the follow-up data is known to be 100% complete. Compared to the existing cohorts of gastric cancer, the majority of which are hospital-based multicentre cohorts originating from high-volume institutions, the present cohort adds real-life data from unselected patients operated at unselected institutions.

Possible limitations include the exclusion of non-operated cancer patients. The data collection of non-operated patients was deemed unfeasible by the consortium due to their large number and the complicated application process for study permissions from each of the more than 200 primary care facilities separately. The retrospective design allows the collection of large surgical dataset, but might potentially limit data quality, especially on variables that have not been routinely reported, such as smoking, alcohol use, the number of lymph nodes collected, or postoperative complications. Furthermore, the long time span of the study might be a limitation in some studies evaluating treatment effects on survival due to changes in patterns of treatment over time. Missing patient data due to missing or destroyed records might limit some analyses, but the high-quality registry data allows non-participation analysis along with the use of multiple imputation methods to overcome these issues.

1  
2  
3 The present cohort was formed using cancer diagnoses in both cancer and patient registry.  
4  
5 Most of the patients were identified in both registries, while less than 10% of the patients  
6  
7 were not. It is plausible that some patients were not reported to the cancer registry, as the  
8  
9 reporting is required by law but still on the clinicians' responsibility. For those that had no  
10  
11 cancer diagnosis in the patient registry but still had cancer reported to the cancer registry, the  
12  
13 reasons might be more complicated as the discharge diagnoses are required to discharge a  
14  
15 patient and forwarded automatically to the registry. It might be that these patients had an  
16  
17 unclear tumour at the time of operation and the cancer was reported to the cancer registry at  
18  
19 the time of histological confirmation, but the diagnosis was not updated in the patient records  
20  
21 at any time. In the future, the reasons for missing diagnoses are to be examined in detail after  
22  
23 the completion of the collection of patient records.  
24  
25  
26  
27  
28

29 The median age at surgery for the gastric cancer patients in the present study was quite  
30  
31 constantly at 70 years, which is three years lower compared to surgically treated patients in a  
32  
33 recent Swedish population-based study.<sup>22</sup> The male predominance (54.5%) observed in this  
34  
35 study was somewhat less prominent than in the Swedish study, where 58% of the gastric non-  
36  
37 cardia adenocarcinoma and 76% of cardia carcinoma were male,<sup>22</sup> as well as in a population-  
38  
39 based study from the Netherlands where 61% were male.<sup>23</sup> The patients had less comorbidity  
40  
41 (64.4% had no comorbidities) in the present study, compared to the population-based Swedish  
42  
43 (58%-65%),<sup>22</sup> and Dutch studies (20-41%).<sup>23</sup> Taken together, the demographics of the gastric  
44  
45 cancers in FINEGO are highly similar to other population-based studies in gastric cancer.  
46  
47  
48

49 Education data was missing for the majority due to the introduction of education registry in  
50  
51 1970, when the majority of the patients had already obtained their highest education.  
52  
53  
54

55 According to the data provided by the cancer registry, the majority had local cancer, but also  
56  
57 more than 30% had advanced cancer. Reflecting on the relatively good 5-year survival of 35%  
58  
59 and taking into account the long study period it would be plausible that at least some of these  
60

1  
2  
3 patients might have had only local or locally advanced cancer at the time of the operation. It  
4  
5 might be that such cancer might have been reported to the cancer registry not by the surgeon  
6  
7 at operation, but only at the time of the recurrence by the oncologist, whereby a more  
8  
9 advanced stage would have been registered. Histology was adenocarcinoma in the majority of  
10  
11 the patients with histology data available (94%), as expected. Dividing the patients into  
12  
13 intestinal and diffuse type cancers was not possible with the available data, as the majority of  
14  
15 the patients had a histomorphology code of adenocarcinoma NOS. We aim to validate the  
16  
17 cancer registry staging data against the patient records collected from each individual to  
18  
19 establish a view on the accuracy of cancer staging information after finishing the patient  
20  
21 records and pathology data collection.  
22  
23  
24  
25

26  
27 The majority of the patients underwent gastrectomy while esophagectomy and combined  
28  
29 esophago-gastrectomy were probably more frequently used in cardia cancer. There were only  
30  
31 113 laparoscopic resections in the cohort, compared with more than 10,000 open procedures.  
32  
33 Gastric cancer is rarely diagnosed at early stage in Finland, and it was only recently shown  
34  
35 that laparoscopic gastrectomy has oncologically comparable results to open resection in  
36  
37 locally advanced cancer.<sup>24 25</sup> The low number may also reflect the fact that no separate code  
38  
39 exists for laparoscopic total gastrectomy in the NOMESCO-classification, which might result  
40  
41 in a notable underestimation of laparoscopic procedures for gastric cancer. However, total  
42  
43 gastrectomies may still be coded under “other laparoscopic gastrectomy”. The use of EMR  
44  
45 and ESD was also low, but these emerging treatments for early-stage or intramucosal cancers  
46  
47 only suitable for a minority of the patients are more and more used. Neoadjuvant- and  
48  
49 perioperative treatments became more common in Finland during the last ten years of the  
50  
51 study period, after the publication of several landmark trials.<sup>6 26</sup> In the total cohort, 12% of the  
52  
53 patients underwent neoadjuvant or perioperative therapy, which mostly was given as  
54  
55 chemotherapy, with increase over time. As Finnish Cancer Registry relies on passive  
56  
57  
58  
59  
60

1  
2  
3 recording (clinician notifications) on oncological treatments, it is possible that some or even a  
4 majority of oncological treatments have not been recorded, resulting in a probable  
5 underestimation of oncological treatments. Due to registration of neoadjuvant treatment, there  
6 was no way to examine the use of HER-2 related treatment using registry data. However, this  
7 is possible after finishing the data collection from the patient records.  
8  
9

10  
11  
12 During the study period, gastric cancer resections have been heavily centralized by  
13 governmental efforts. There were a total of 68 institutions that conducted gastrectomies  
14 during the study period, while in 2015 there were only 19 institutions. Due to the rapidly  
15 decreasing incidence of gastric cancer, the median annual hospital volume of gastrectomies  
16 has also decreased from 1987 to 2016. Low center volumes and gastric cancer becoming a  
17 relatively rare cancer might at least partly explain the slow adoption of minimally invasive  
18 gastrectomies in clinical practice.  
19  
20  
21  
22  
23  
24  
25  
26  
27  
28  
29  
30

31  
32 The 5-year survival in the surgically treated gastric cancer patients (34.6%) reflects that of the  
33 Swedish study (21%-44% in different 5-year periods),<sup>22</sup> and is in fact much better than  
34 survival of the operated stage I-III non-cardia gastric adenocarcinoma patients (15%-29% in  
35 the different time periods) in the Dutch study.<sup>23</sup> This observation further supports the  
36 hypothesis that there might be some over-estimation of cancer stage for gastric cancer in the  
37 Finnish Cancer Registry.  
38  
39  
40  
41  
42  
43  
44  
45  
46

47 Taken together, this population-based, nationwide retrospective cohort study will provide new  
48 evidence regarding various unanswered questions in oesophageal and gastric cancer surgery  
49 by combining epidemiological and clinical data, as well as complement randomized clinical  
50 trials by assessing their findings in an unselected population.  
51  
52  
53  
54  
55  
56  
57  
58  
59  
60

## Collaboration

All data from FINEGO presented in this article are stored by the research group on safe servers at University of Oulu, Finland, and handled confidentially. Currently, only the research team has access to the data. Data access to collaborators can be granted given that relevant government and health officials approve the collaborative study. Researchers interested in collaboration, for example joint efforts combining the dataset with other population-based studies, are welcome to contact Joonas Kauppila (joonas.kauppila@oulu.fi), principal investigator.



## References

1. Global Burden of Disease Cancer C, Fitzmaurice C, Allen C, et al. Global, Regional, and National Cancer Incidence, Mortality, Years of Life Lost, Years Lived With Disability, and Disability-Adjusted Life-years for 32 Cancer Groups, 1990 to 2015: A Systematic Analysis for the Global Burden of Disease Study. *JAMA Oncol* 2017;3(4):524-48. doi: 10.1001/jamaoncol.2016.5688 [published Online First: 2016/12/06]
2. Luo G, Zhang Y, Guo P, et al. Global patterns and trends in stomach cancer incidence: Age, period and birth cohort analysis. *Int J Cancer* 2017;141(7):1333-44. doi: 10.1002/ijc.30835 [published Online First: 2017/06/15]
3. : Finnish Cancer Registry; [Available from: <https://cancerregistry.fi/statistics/cancer-statistics/> accessed 5/3/2020.
4. Van Cutsem E, Sagaert X, Topal B, et al. Gastric cancer. *Lancet* 2016;388(10060):2654-64. doi: 10.1016/S0140-6736(16)30354-3 [published Online First: 2016/05/10]
5. Ferlay J, Shin HR, Bray F, et al. Estimates of worldwide burden of cancer in 2008: GLOBOCAN 2008. *Int J Cancer* 2010;127(12):2893-917. doi: 10.1002/ijc.25516 [published Online First: 2011/02/26]
6. Cunningham D, Allum WH, Stenning SP, et al. Perioperative chemotherapy versus surgery alone for resectable gastroesophageal cancer. *N Engl J Med* 2006;355(1):11-20. doi: 10.1056/NEJMoa055531 [published Online First: 2006/07/11]
7. Asplund J, Kauppila JH, Mattsson F, et al. Survival Trends in Gastric Adenocarcinoma: A Population-Based Study in Sweden. *Ann Surg Oncol* 2018;25(9):2693-702. doi: 10.1245/s10434-018-6627-y [published Online First: 2018/07/11]
8. Gottlieb-Vedi E, Mattsson F, Lagergren P, et al. Annual hospital volume of surgery for gastrointestinal cancer in relation to prognosis. *Eur J Surg Oncol* 2019;45(10):1839-46. doi: 10.1016/j.ejso.2019.03.016 [published Online First: 2019/03/25]
9. Seufert RM, Schmidt-Matthiesen A, Beyer A. Total gastrectomy and oesophagojejunostomy--a prospective randomized trial of hand-sutured versus mechanically stapled anastomoses. *Br J Surg* 1990;77(1):50-2. doi: 10.1002/bjs.1800770118 [published Online First: 1990/01/01]
10. Takeyoshi I, Ohwada S, Ogawa T, et al. Esophageal anastomosis following gastrectomy for gastric cancer: comparison of hand-sewn and stapling technique. *Hepatogastroenterology* 2000;47(34):1026-9. [published Online First: 2000/10/06]
11. Brown AM, Giugliano DN, Berger AC, et al. Surgical approaches to adenocarcinoma of the gastroesophageal junction: the Siewert II conundrum. *Langenbecks Arch Surg* 2017;402(8):1153-58. doi: 10.1007/s00423-017-1610-9 [published Online First: 2017/08/15]
12. Thygesen LC, Ersboll AK. When the entire population is the sample: strengths and limitations in register-based epidemiology. *Eur J Epidemiol* 2014;29(8):551-8. doi: 10.1007/s10654-013-9873-0 [published Online First: 2014/01/11]
13. Maret-Ouda J, Tao W, Wahlin K, et al. Nordic registry-based cohort studies: Possibilities and pitfalls when combining Nordic registry data. *Scand J Public Health* 2017;45(17\_suppl):14-19. doi: 10.1177/1403494817702336 [published Online First: 2017/07/08]
14. Kauppila JH, Ohtonen P, Karttunen TJ, et al. Finnish National Esophago-Gastric Cancer Cohort (FINEGO) for studying outcomes after oesophageal and gastric cancer surgery: a protocol for a retrospective, population-based, nationwide cohort study in Finland. *BMJ Open* 2019;9(1):e024094. doi: 10.1136/bmjopen-2018-024094 [published Online First: 2019/02/21]
15. Ludvigsson JF, Otterblad-Olausson P, Pettersson BU, et al. The Swedish personal identity number: possibilities and pitfalls in healthcare and medical research. *Eur J Epidemiol* 2009;24(11):659-67. doi: 10.1007/s10654-009-9350-y [published Online First: 2009/06/09]

16. Brusselaers N, Lagergren J. The Charlson Comorbidity Index in Registry-based Research. *Methods Inf Med* 2017;56(5):401-06. doi: 10.3414/ME17-01-0051 [published Online First: 2017/01/01]
17. Cutler SJ, Ederer F. Maximum utilization of the life table method in analyzing survival. *J Chronic Dis* 1958;8(6):699-712. doi: 10.1016/0021-9681(58)90126-7 [published Online First: 1958/12/01]
18. Lindblad M, Ye W, Lindgren A, et al. Disparities in the classification of esophageal and cardia adenocarcinomas and their influence on reported incidence rates. *Ann Surg* 2006;243(4):479-85. doi: 10.1097/01.sla.0000205825.34452.43 [published Online First: 2006/03/23]
19. Kemi NA, Eskuri M, Pohjanen VM, et al. Histological assessment of stromal maturity as a prognostic factor in surgically treated gastric adenocarcinoma. *Histopathology* 2019;75(6):882-89. doi: 10.1111/his.13934 [published Online First: 2019/06/08]
20. Kemi N, Eskuri M, Ikalainen J, et al. Tumor Budding and Prognosis in Gastric Adenocarcinoma. *Am J Surg Pathol* 2019;43(2):229-34. doi: 10.1097/PAS.0000000000001181 [published Online First: 2018/10/20]
21. Kemi N, Eskuri M, Herva A, et al. Tumour-stroma ratio and prognosis in gastric adenocarcinoma. *Br J Cancer* 2018;119(4):435-39. doi: 10.1038/s41416-018-0202-y [published Online First: 2018/07/31]
22. Asplund J, Kauppila JH, Mattsson F, et al. Survival Trends in Gastric Adenocarcinoma: A Population-Based Study in Sweden. *Ann Surg Oncol* 2018 doi: 10.1245/s10434-018-6627-y [published Online First: 2018/07/11]
23. Dassen AE, Lemmens VE, van de Poll-Franse LV, et al. Trends in incidence, treatment and survival of gastric adenocarcinoma between 1990 and 2007: a population-based study in the Netherlands. *Eur J Cancer* 2010;46(6):1101-10. doi: 10.1016/j.ejca.2010.02.013 [published Online First: 2010/03/12]
24. Beyer K, Baukloh AK, Kamphues C, et al. Laparoscopic versus open gastrectomy for locally advanced gastric cancer: a systematic review and meta-analysis of randomized controlled studies. *World J Surg Oncol* 2019;17(1):68. doi: 10.1186/s12957-019-1600-1 [published Online First: 2019/04/17]
25. Yu J, Huang C, Sun Y, et al. Effect of Laparoscopic vs Open Distal Gastrectomy on 3-Year Disease-Free Survival in Patients With Locally Advanced Gastric Cancer: The CLASS-01 Randomized Clinical Trial. *JAMA* 2019;321(20):1983-92. doi: 10.1001/jama.2019.5359 [published Online First: 2019/05/29]
26. Ychou M, Boige V, Pignon JP, et al. Perioperative chemotherapy compared with surgery alone for resectable gastroesophageal adenocarcinoma: an FNCLCC and FFCD multicenter phase III trial. *J Clin Oncol* 2011;29(13):1715-21. doi: 10.1200/JCO.2010.33.0597 [published Online First: 2011/03/30]

**Table 1. Identification of the gastric cancer patients by source registry**

|                                                                          | <b>Patients<br/>Number (%)</b> |
|--------------------------------------------------------------------------|--------------------------------|
| Total                                                                    | 10,457 (100)                   |
| Cancer diagnosis in both hospital discharge registry and cancer registry | 9,421 (90.1)                   |
| Cancer diagnosis in only hospital discharge registry                     | 699 (6.7)                      |
| Cancer diagnosis in only cancer registry                                 | 265 (2.5)                      |
| Unclear tumor diagnosis and surgery code in hospital discharge registry  | 72 (0.7)                       |

**Table 2. Demographics of the surgically treated gastric cancer patients in Finland 1987 - 2016**

|                                   | <b>Patients<br/>Number (%)</b> |
|-----------------------------------|--------------------------------|
| <b>Total</b>                      | 10,457 (100)                   |
| <b>Age at surgery</b>             |                                |
| ≤50 years                         | 1,017 (9.7)                    |
| 51-60 years                       | 1,605 (15.3)                   |
| 61-70 years                       | 2,856 (27.3)                   |
| 71-80 years                       | 3,479 (33.3)                   |
| >80 years                         | 1,500 (14.3)                   |
| <b>Sex</b>                        |                                |
| Male                              | 5,695 (54.5)                   |
| Female                            | 4,762 (45.5)                   |
| <b>Education</b>                  |                                |
| ≤12 years                         | 1,960 (18.7)                   |
| 13-15 years                       | 994 (9.5)                      |
| >15 years                         | 296 (2.8)                      |
| Missing                           | 7,207 (68.9)                   |
| <b>Charlson Comorbidity Index</b> |                                |
| 0                                 | 6,731 (64.4)                   |
| 1                                 | 2,408 (23.0)                   |
| 2                                 | 892 (8.5)                      |
| 3                                 | 287 (2.7)                      |
| ≥4                                | 139 (1.3)                      |
| <b>Stage</b>                      |                                |
| Local                             | 3,208 (30.7)                   |
| Locally advanced                  | 2,146 (20.5)                   |
| Advanced                          | 2,444 (23.4)                   |
| Unclear                           | 1,995 (18.3)                   |
| Missing                           | 744 (7.1)                      |
| <b>Histology</b>                  |                                |
| Adenocarcinoma                    | 9,154 (87.6)                   |
| Other                             | 559 (5.3)                      |
| Missing                           | 744 (7.1)                      |

**Table 3. Treatment details of the gastric cancer patients included in FINEGO**

|                                               | <b>Patients<br/>Number (%)</b> |
|-----------------------------------------------|--------------------------------|
| <b>Total</b>                                  | 10,457 (100)                   |
| <b>Surgery type</b>                           |                                |
| Gastrectomy                                   | 10,140 (97.0)                  |
| Esophagectomy                                 | 145 (1.4)                      |
| Esophagogastrectomy                           | 98 (0.9)                       |
| EMR or ESD                                    | 74 (0.7)                       |
| <b>Surgical Approach</b>                      |                                |
| Open                                          | 10,270 (98.2)                  |
| Minimally invasive                            | 113 (1.1)                      |
| Not applicable                                | 74 (0.7)                       |
| <b>Neoadjuvant or perioperative treatment</b> |                                |
| None                                          | 9,248 (88.4)                   |
| Chemotherapy                                  | 984 (9.4)                      |
| Radiotherapy                                  | 55 (0.5)                       |
| Chemoradiotherapy                             | 170 (1.6)                      |
| <b>Hospital volume of gastrectomy</b>         |                                |
| 1-10 per year                                 | 2,602 (24.9)                   |
| 11-20 per year                                | 3,428 (32.8)                   |
| 21-30 per year                                | 1,963 (18.8)                   |
| 31-81 per year                                | 2,236 (21.4)                   |
| Not applicable or available                   | 228 (2.2)                      |

## Figure legends

**Figure 1.** The number of incident gastric cancers and gastric cancer deaths, according to the Finnish Cancer Registry.<sup>3</sup>

**Figure 2.** Number of surgically treated gastric cancer patients per 100,000 population between 1987 and 2016.

**Figure 3.** The median age at surgery and median annual volume of gastrectomies over time in Finland.

**Figure 4.** Kaplan-Meier curve depicting 10-year all-cause mortality in the surgically treated gastric cancer patients.

**Figure 5.** Kaplan-Meier curve depicting 10-year cancer-specific mortality in the gastric cancer patients.

1  
2  
3  
4  
5  
6  
7  
8  
9  
10  
11  
12  
13  
14  
15  
16  
17  
18  
19  
20  
21  
22  
23  
24  
25  
26  
27  
28  
29  
30  
31  
32  
33  
34  
35  
36  
37  
38  
39  
40  
41  
42  
43  
44  
45  
46  
47  
48  
49  
50  
51  
52  
53  
54  
55  
56  
57  
58  
59  
60

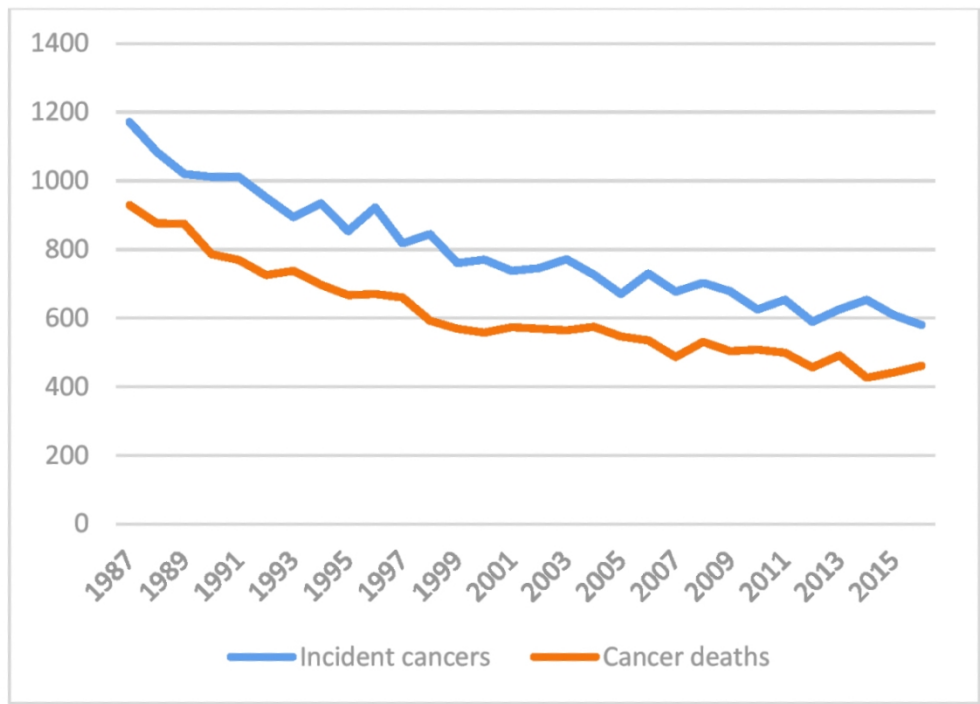

The number of incident gastric cancers and gastric cancer deaths, according to the Finnish Cancer Registry.

109x79mm (300 x 300 DPI)



Number of surgically treated gastric cancer patients per 100,000 population between 1987 and 2016.

104x75mm (300 x 300 DPI)



1  
2  
3  
4  
5  
6  
7  
8  
9  
10  
11  
12  
13  
14  
15  
16  
17  
18  
19  
20  
21  
22  
23  
24  
25  
26  
27  
28  
29  
30  
31  
32  
33  
34  
35  
36  
37  
38  
39  
40  
41  
42  
43  
44  
45  
46  
47  
48  
49  
50  
51  
52  
53  
54  
55  
56  
57  
58  
59  
60



The median age at surgery and median annual volume of gastrectomies over time in Finland.

113x109mm (300 x 300 DPI)



Kaplan-Meier curve depicting 10-year all-cause mortality in the surgically treated gastric cancer patients.

165x117mm (300 x 300 DPI)

1  
2  
3  
4  
5  
6  
7  
8  
9  
10  
11  
12  
13  
14  
15  
16  
17  
18  
19  
20  
21  
22  
23  
24  
25  
26  
27  
28  
29  
30  
31  
32  
33  
34  
35  
36  
37  
38  
39  
40  
41  
42  
43  
44  
45  
46  
47  
48  
49  
50  
51  
52  
53  
54  
55  
56  
57  
58  
59  
60



Kaplan-Meier curve depicting 10-year cancer-specific mortality in the gastric cancer patients.

165x117mm (300 x 300 DPI)



**13 Preoperative lab****Value****Date****Not available**

|         |       |       |       |
|---------|-------|-------|-------|
| Hb:     | _____ | _____ | _____ |
| Alb:    | _____ | _____ | _____ |
| Prealb: | _____ | _____ | _____ |
| CRP     | _____ | _____ | _____ |
| BMI     | _____ | _____ | _____ |

**14 ASA Class**

\_\_\_\_\_

**15 Resection type:**  
(circle)

1. Transthoracic resection: a. Ivor-Lewis, b. McKeown
2. Transhiatal resection
3. Total gastrectomy
4. Proximal gastrectomy
5. Distal gastrectomy
6. Other \_\_\_\_\_

**16 Intent of surgical approach**

1. Open surgery
2. Hybrid thoroscopic
3. Hybrid laparoscopic
4. Totally minimally invasive (thoracoscopy + laparoscopy)
5. Totally laparoscopic (no thoracotomy/scopy)
5. Other \_\_\_\_\_

**16.1 Only minimally invasive surgery: converted open?**

0. No
1. Converted to hybrid
2. Yes

**17 Lymphadenectomy****Esophagectomy**

1. 2-field
2. Extended 2-field
3. 3-field

**Gastrectomy**

4. D0 lymphadenectomy
5. D1 lymphadenectomy
6. D2 lymphadenectomy
7. D3 lymphadenectomy
999. Unclear

**18 Tumor length: ..... mm****19 Substitute:**

1. Stomach
2. Small intestine
3. Colon

**20 Type of anastomosis:**

1. Handsewn:
2. Staples

**21 Location of anastomosis:**

1. Neck
2. Thorax
3. Abdomen

**22 Splenectomy:**

1. Yes: why? .....
2. No

- 1 **23 Use of energy devices** 1. Bipolar (LigaSure)  
 2 2. Ultrascision (Harmonic),  
 3 3. Hybrid (Thunderbeat)  
 4 4. Other .....
- 5 5. No
- 6
- 7 **24 Fundoplication:** 1. Before surgery: type? .....
- 8 2. During surgery: type? .....
- 9 3. No
- 10
- 11 **25 Frozen section (circle all that apply):**
- 12 1. Distal resection margin 4. None
- 13 2. Proximal resection margin 998. Not clear
- 14 3. Lymph node
- 15
- 16 **26 Jejunio-cath (feeding enterostomy):** 1. Yes
- 17 2. No
- 18
- 19 **27 Curative intended treatment:** 1. Yes
- 20 2. No (palliative resection)
- 21 3. Rescue surgery (after curative chemoradiation)
- 22 998. Not clear
- 23
- 24
- 25 **28 Duration of surgery:** ..... min (surgery start-stop)
- 26
- 27 **29 Peroperative bleeding**..... ml
- 28
- 29 For the following, count only midnights; morning Wednesday to evening Thursday = 1
- 30 **30 Days at the ICU** .....
- 31
- 32 **31 Days in respirator:** .....
- 33
- 34 **32 Days in hospital:** .....
- 35
- 36 **33 Further treatment in:**
- 37 1. Home
- 38 2. Health care center (terveyskeskus)
- 39 3. Another hospital
- 40 4. Rehabilitation center
- 41 5. Other \_\_\_\_\_
- 42
- 43 **34 Complications in 90 days after operation:** 1. No
- 44 2. Yes (fill in pages 6-10)
- 45
- 46 **35 Reoperations in 90 days after operation:** 1. No
- 47 2. Yes (fill in pages 6-10)
- 48
- 49 **36 Adjuvant treatment** 1.No
- 50 2. Chemotherapy
- 51 3. Radiotherapy
- 52
- 53 **37 Adjuvant treatment status** 1. Completed without complications
- 54 2. Complications: \_\_\_\_\_
- 55 3. Not completed, why? \_\_\_\_\_
- 56
- 57
- 58
- 59
- 60

1 **38 Proximal resection margin: ..... mm**

2  
3 **39 Distal resection margin: ..... mm**

4  
5 **40 Circumferential resection margin: ..... mm**

6  
7 **41 Histology:**

- 8 1. Adenocarcinoma
- 9 2. Squamous cell carcinoma
- 10 3. High-grade dysplasia
- 11 4. Low-grade dysplasia
- 12 5. Other \_\_\_\_\_
- 13 999 Not clear

14  
15  
16 **41.1 Laurén class:**

- 17 1. Diffuse
- 18 2. Intestinal
- 19 3. Indeterminate
- 20 999. Unavailable

16 **41.2 WHO histology classification (gastric cancer)**

- 17 1. Papillary
- 18 2. Tubular
- 19 3. Mucinous
- 20 4. Signet ring / poorly cohesive
- 21 5. Other types, which \_\_\_\_\_
- 22 999. Unavailable

23  
24  
25  
26 **42 Preoperative stage (before any treatment)**

27 **T:**

- 28 1 Tis
- 29 2 T1 – T3
- 30 3 T1
- 31 4 T2
- 32 5 T3
- 33 6 T4
- 34 7 Tx
- 35 8 T0

36  
37 **43 N:**

- 38 1 N0
- 39 2 N1
- 40 3 N2
- 41 4 N3
- 42 999 not clear

43  
44 **44 M:**

- 45 0 M0
- 46 1 MIa
- 47 2 MIb
- 48 999 Not Clear

**45 Postoperative stage (According to PAD or patient records)**

**T:**

- 1 Tis
- 2 T1 – T3
- 3 T1
- 4 T2
- 5 T3
- 6 T4
- 7 Tx
- 8 T0

**46 N:**

- 1 N0
- 2 N1
- 3 N2
- 4 N3
- 999 not clear

**47 Lymph nodes with metastasis:** ..... pcs

**48 Number of Lymph nodes examined:**..... pcs

**49 M:**

- 0 M0
- 1 MIa
- 2 MIb
- 999 Not Clear

**50 G/Differentiation:**

1. G1, well differentiated
2. G2, moderately differentiated
3. G3, poorly differentiated
4. GX, cannot be assessed

**51 Tumor stage:**

- 0 0 (pat only op)
- 1 I
- 2 IIA
- 3 IIB
- 4 III
- 5 IV
- 6 IVA
- 7 IVB
- 8 No cancer/dysplasia
- 9 Complete response after neo
- 999 not clear

**52 Micr radically:**

|               |                    |               |
|---------------|--------------------|---------------|
| 0 No          | <b>54 R0/R1/R2</b> | 1 R0          |
| 1 Yes         |                    | 2 R1          |
| 999 Not clear |                    | 3 R2          |
|               |                    | 999 not clear |

**53 Macr radically:**

- 0 No
- 1 Yes
- 999 Not Clear

**55 Becker regression grade:**

|                           |                        |
|---------------------------|------------------------|
| 1. No tumor left (1a)     | 4. >50% tumor left (3) |
| 2. <10% tumor left (1b)   |                        |
| 3. <10-50% tumor left (2) | 999. Not applicable    |



**COMPLICATIONS**

**56 Complications during 30 days after surgery (circle) and 30-90 days after surgery (square)  
-Mark the main categories and all sub-categories that apply!**

1. Pulmonary complications
  - a. Pneumonia
  - b. Pleural effusion requiring additional drainage procedure
  - c. Pneumothorax requiring treatment
  - d. Atelectasis mucous plugging requiring bronchoscopy
  - e. Respiratory failure requiring intubation
  - f. Acute respiratory distress syndrome (ARDS)
  - g. Acute aspiration
  - h. Tracheobronchial injury
  - i. Chest tube for air leak over 10 days postop
  
2. Cardiac complications
  - a. Cardiac arrest requiring CPR
  - b. Myocardial infarction (Troponin + ECG)
  - c. Atrial dysrhythmia requiring treatment
  - d. Ventricular dysrhythmia requiring treatment
  - e. Congestive heart failure requiring treatment
  - f. Pericarditis requiring treatment

- 1 3. Gastrointestinal complications
- 2
- 3 a. Esophagoenteric leak from anastomosis or conduit necrosis
- 4
- 5 i. Type 1: local defect requiring no change in therapy, treated medically or diet
- 6
- 7 ii. Type 2: requiring intervention, no surgery (radiology, stent, bedside opening)
- 8
- 9 iii. Type 3: Defect requiring surgery
- 10
- 11
- 12 b. Conduit necrosis/failure
- 13
- 14 i. Type 1: Focal conduit necrosis identified endoscopically, causes additional
- 15 monitoring or non-surgical therapy
- 16
- 17 ii. Type 2: Focal conduit necrosis, treated by surgical therapy but not diversion
- 18
- 19 iii. Type 3: Conduit necrosis requiring conduit resection and diversion
- 20
- 21
- 22
- 23 c. Ileus preventing or delaying enteral feeding
- 24
- 25 d. Small bowel obstruction
- 26
- 27 e. Feeding J-tube complication
- 28
- 29 f. Pyloromyotomy/pyloroplasty complication
- 30
- 31
- 32 g. Clostridium infection
- 33
- 34
- 35 h. GI bleeding requiring intervention or transfusion
- 36
- 37 i. Delayed conduit emptying requiring intervention or delaying discharge, or requiring
- 38 nasogastric tube >7 days
- 39
- 40
- 41 j. Pancreatitis
- 42
- 43
- 44 k. Pancreatic fistula
- 45
- 46
- 47 l. Liver dysfunction
- 48
- 49 m. Biliary leakage
- 50
- 51
- 52
- 53
- 54
- 55
- 56
- 57
- 58
- 59
- 60

- 1  
2  
3  
4  
5  
6  
7  
8  
9  
10  
11  
12  
13  
14  
15  
16  
17  
18  
19  
20  
21  
22  
23  
24  
25  
26  
27  
28  
29  
30  
31  
32  
33  
34  
35  
36  
37  
38  
39  
40  
41  
42  
43  
44  
45  
46  
47  
48  
49  
50  
51  
52  
53  
54  
55  
56  
57  
58  
59  
60
4. Urologic
    - a. Acute renal failure (doubling of baseline creatinine)
    - b. Acute renal failure requiring dialysis
    - c. Urinary tract infection
    - d. Urinary retention requiring re-insertion of catheter, delaying discharge, or discharge with catheter
  
  5. Thromboembolic
    - a. DVT (ultrasound or angio verified)
    - b. Pulmonary embolism
    - c. Stroke (defined by CT or similar)
    - d. Peripheral thrombophlebitis (clinically verified)
  
  6. Neurologic / psychiatric
    - a. Recurrent nerve paresis (mark: A unilateral, B bilateral)
      - i. Type 1: Transient injury, requires no other therapy than dietary modification
      - ii. Type 2: Injury requiring elective surgery (thyroplasty or medialization procedure)
      - iii. Type 3: Injury requiring acute surgery due to aspiration or respiratory issues
    - b. Other neurologic injury
    - c. Acute delirium
    - d. Delirium tremens (alcohol withdrawal symptom)

- 1  
2  
3  
4  
5  
6  
7  
8  
9  
10  
11  
12  
13  
14  
15  
16  
17  
18  
19  
20  
21  
22  
23  
24  
25  
26  
27  
28  
29  
30  
31  
32  
33  
34  
35  
36  
37  
38  
39  
40  
41  
42  
43  
44  
45  
46  
47  
48  
49  
50  
51  
52  
53  
54  
55  
56  
57  
58  
59  
60
7. Infection
    - a. Wound infection requiring opening wound or antibiotics
    - b. Central line infection requiring removal or antibiotics
    - c. Intra-abdominal abscess
    - d. Intrathoracic abscess
    - e. Sepsis
    - f. Other infection requiring antibiotics, what .....
  8. Wound/diaphragm
    - a. Thoracic wound dehiscence
    - b. Acute abdominal wall dehiscence / hernia
    - c. Acute diaphragmatic hernia
  9. Other
    - a. Chyle leak (Mark: A. <1 liter per day, B >1 liter per day)
      - i. Type 1: requires dietary modifications, but not totally parenteral nutrition
      - ii. Type 2: requires totally parenteral nutrition
      - iii. Type 3: requires surgery or other intervention (chest drains not included)
    - b. Reoperation for reason other than bleeding, anastomotic leak or conduit necrosis, reason.....
    - c. Multiple organ failure

**57 Clavien-Dindo classification for complications (only the most severe grade to be ticked)**

0. No complications
1. Grade 1 (Any deviation from postoperative course, including antiemetics, antipyretics, analgetics, diuretics and electrolytes and physiotherapy or opening the wound bedside)\*
2. Grade 2 (Blood transfusion, total parenteral nutrition or pharmacological treatment needed other than I)
3. Grade 3 (Surgical, endoscopic or radiological intervention)
4. Grade 4 (Life-threatening complications requiring IC/ICU-management, or stroke (not TIA) or any brain hemorrhage)
5. Grade 5 (Death of a patient)

**58 REOPERATIONS****Reoperation 1**

Days from primary operation: \_\_\_\_\_

Reason for operation: \_\_\_\_\_

Result: \_\_\_\_\_

**Reoperation 2**

Days from primary operation: \_\_\_\_\_

Reason for operation: \_\_\_\_\_

Result: \_\_\_\_\_

**Reoperation 3**

Days from primary operation: \_\_\_\_\_

Reason for operation: \_\_\_\_\_

Result: \_\_\_\_\_
