# Supplementary material for: Cohort profile: gastric cancer in the population-based, Finnish National Esophago-Gastric Cancer Cohort (FINEGO) Study
Source: PubMed Central journal article supplement — BMJ Open. 2020 Oct 16;10(10):e039574. doi: 10.1136/bmjopen-2020-039574 (PMC7569918; doi:10.1136/bmjopen-2020-039574), 2020-10-16
Supplement: bmjopen-2020-039574supp001.pdf [file bmjopen-2020-039574supp001.pdf]

## FINEGO clinical data collection form

**Personal identification number:**.....

**1 Hospital:** .....

**2 Operation date:**.....

**3 Surgeon(s)** 1:..... (First name, Surname)

2: .....

3: .....

**4 Anesthesiologist(s):** 1:..... (First name, Surname)

2:.....

3:.....

**5 Operation codes:**.....

**6 Anesthesia codes:**.....

**7 Sex:**  
1. Man  
2. Woman

**8 Tumor localization**  
1. Upper 1/3 (upper border <25 cm from incisors)  
2. Middle 1/3 (upper border 25-30 cm)  
3. Lower 1/3 (upper border >30 cm)  
4. Cardia, Siewert type 2 (center -1 - +2cm from Z line)  
5. Cardia, Siewert type 3 (center 2-5cm below Z line)  
6. Stomach body  
7. Stomach distal  
999 Not clear

**9 Treatment determined in multidisciplinary meeting**

0. No

1. Yes

**10 Preop Treatment:**  
0. No  
1. Yes  
998. Not clear

**11 Type of treatment:**  
1. Chemotherapy  
2. Radiation  
3. Radiation+Chemotherapy

**12 Complications of neoadjuvant treatment**

0. None, completed as planned

1. Yes, with delay/reduction, why \_\_\_\_\_

2. Yes, with termination, why \_\_\_\_\_

FINEGO data form (esophageal and gastric cancer)

**13 Preoperative lab**

|         | Value | Date  | Not available |
|---------|-------|-------|---------------|
| Hb:     | _____ | _____ | _____         |
| Alb:    | _____ | _____ | _____         |
| Prealb: | _____ | _____ | _____         |
| CRP     | _____ | _____ | _____         |
| BMI     | _____ | _____ | _____         |

**14 ASA Class**

\_\_\_\_\_

**15 Resection type:**  
(circle)

1. Transthoracic resection: a. Ivor-Lewis, b. McKeown
2. Transhiatal resection
3. Total gastrectomy
4. Proximal gastrectomy
5. Distal gastrectomy
6. Other \_\_\_\_\_

**16 Intent of surgical approach**

1. Open surgery
2. Hybrid thoracoscopic
3. Hybrid laparoscopic
4. Totally minimally invasive (thoracoscopy + laparoscopy)
5. Totally laparoscopic (no thoracotomy/scopy)
5. Other \_\_\_\_\_

**16.1 Only minimally invasive surgery: converted open?**

0. No
1. Converted to hybrid
2. Yes

**17 Lymphadenectomy****Esophagectomy**

1. 2-field
2. Extended 2-field
3. 3-field

**Gastrectomy**

4. D0 lymphadenectomy
5. D1 lymphadenectomy
6. D2 lymphadenectomy
7. D3 lymphadenectomy
999. Unclear

**18 Tumor length: ..... mm****19 Substitute:**

1. Stomach
2. Small intestine
3. Colon

**20 Type of anastomosis:**

1. Handsewn:
2. Staples

**21 Location of anastomosis:**

1. Neck
2. Thorax
3. Abdomen

**22 Splenectomy:**

1. Yes: why? .....
2. No

FINEGO data form (esophageal and gastric cancer)

- 23 Use of energy devices**
1. Bipolar (LigaSure)
  2. Ultrascision (Harmonic),
  3. Hybrid (Thunderbeat)
  4. Other .....
  5. No
- 24 Fundoplication:**
1. Before surgery: type? .....
  2. During surgery: type? .....
  3. No
- 25 Frozen section (circle all that apply):**
1. Distal resection margin
  2. Proximal resection margin
  3. Lymph node
  4. None
  998. Not clear
- 26 Jejunio-cath (feeding enterostomy):**
1. Yes
  2. No
- 27 Curative intended treatment:**
1. Yes
  2. No (palliative resection)
  3. Rescue surgery (after curative chemoradiation)
  998. Not clear
- 28 Duration of surgery:** ..... min (surgery start-stop)
- 29 Peroperative bleeding..... ml**
- For the following, count only midnights; morning Wednesday to evening Thursday = 1
- 30 Days at the ICU .....**
- 31 Days in respirator: .....**
- 32 Days in hospital: .....**
- 33 Further treatment in:**
1. Home
  2. Health care center (terveyskeskus)
  3. Another hospital
  4. Rehabilitation center
  5. Other \_\_\_\_\_
- 34 Complications in 90 days after operation:**
1. No
  2. Yes (fill in pages 6-10)
- 35 Reoperations in 90 days after operation:**
1. No
  2. Yes (fill in pages 6-10)
- 36 Adjuvant treatment**
- 1.No
  2. Chemotherapy
  3. Radiotherapy
- 37 Adjuvant treatment status**
1. Completed without complications
  2. Complications: \_\_\_\_\_
  3. Not completed, why? \_\_\_\_\_

FINEGO data form (esophageal and gastric cancer)

**38 Proximal resection margin:** ..... mm

**39 Distal resection margin:** ..... mm

**40 Circumferential resection margin:** ..... mm

**41 Histology:**

1. Adenocarcinoma
2. Squamous cell carcinoma
3. High-grade dysplasia
4. Low-grade dysplasia
5. Other \_\_\_\_\_
- 999 Not clear

**41.1 Laurén class:**

1. Diffuse
2. Intestinal
3. Indeterminate
999. Unavailable

**41.2 WHO histology classification (gastric cancer)**

1. Papillary
2. Tubular
3. Mucinous
4. Signet ring / poorly cohesive
5. Other types, which \_\_\_\_\_
999. Unavailable

**42 Preoperative stage (before any treatment)**

**T:**

- 1 Tis
- 2 T1 – T3
- 3 T1
- 4 T2
- 5 T3
- 6 T4
- 7 Tx
- 8 T0

**43 N:**

- 1 N0
- 2 N1
- 3 N2
- 4 N3
- 999 not clear

**44 M:**

- 0 M0
- 1 MIa
- 2 MIb
- 999 Not Clear

FINEGO data form (esophageal and gastric cancer)

**45 Postoperative stage (According to PAD or patient records)**

**T:**

- 1 Tis
- 2 T1 – T3
- 3 T1
- 4 T2
- 5 T3
- 6 T4
- 7 Tx
- 8 T0

**46 N:**

- 1 N0
- 2 N1
- 3 N2
- 4 N3
- 999 not clear

**47 Lymph nodes with metastasis:** ..... pcs

**48 Number of Lymph nodes examined:**..... pcs

**49 M:**

- 0 M0
- 1 MIa
- 2 MIb
- 999 Not Clear

**50 G/Differentiation:**

1. G1, well differentiated
2. G2, moderately differentiated
3. G3, poorly differentiated
4. GX, cannot be assessed

**51 Tumor stage:**

- 0 0 (pat only op)
- 1 I
- 2 IIA
- 3 IIB
- 4 III
- 5 IV
- 6 IVA
- 7 IVB
- 8 No cancer/dysplasia
- 9 Complete response after neo
- 999 not clear

|                           |               |                    |               |
|---------------------------|---------------|--------------------|---------------|
| <b>52 Micr radically:</b> | 0 No          | <b>54 R0/R1/R2</b> | 1 R0          |
|                           | 1 Yes         |                    | 2 R1          |
|                           | 999 Not clear |                    | 3 R2          |
|                           |               |                    | 999 not clear |

**53 Macr radically:**

- 0 No
- 1 Yes
- 999 Not Clear

**55 Becker regression grade:**

1. No tumor left (1a)
2. <10% tumor left (1b)
3. <10-50% tumor left (2)
4. >50% tumor left (3)
999. Not applicable

FINEGO data form (esophageal and gastric cancer)

## COMPLICATIONS

**56 Complications during 30 days after surgery (circle) and 30-90 days after surgery (square)  
-Mark the main categories and all sub-categories that apply!**

1. Pulmonary complications
  - a. Pneumonia
  - b. Pleural effusion requiring additional drainage procedure
  - c. Pneumothorax requiring treatment
  - d. Atelectasis mucous plugging requiring bronchoscopy
  - e. Respiratory failure requiring intubation
  - f. Acute respiratory distress syndrome (ARDS)
  - g. Acute aspiration
  - h. Tracheobronchial injury
  - i. Chest tube for air leak over 10 days postop
  
2. Cardiac complications
  - a. Cardiac arrest requiring CPR
  - b. Myocardial infarction (Troponin + ECG)
  - c. Atrial dysrhythmia requiring treatment
  - d. Ventricular dysrhythmia requiring treatment
  - e. Congestive heart failure requiring treatment
  - f. Pericarditis requiring treatment

FINEGO data form (esophageal and gastric cancer)

3. Gastrointestinal complications
  - a. Esophagoenteric leak from anastomosis or conduit necrosis
    - i. Type 1: local defect requiring no change in therapy, treated medically or diet
    - ii. Type 2: requiring intervention, no surgery (radiology, stent, bedside opening)
    - iii. Type 3: Defect requiring surgery
  - b. Conduit necrosis/failure
    - i. Type 1: Focal conduit necrosis identified endoscopically, causes additional monitoring or non-surgical therapy
    - ii. Type 2: Focal conduit necrosis, treated by surgical therapy but not diversion
    - iii. Type 3: Conduit necrosis requiring conduit resection and diversion
  - c. Ileus preventing or delaying enteral feeding
  - d. Small bowel obstruction
  - e. Feeding J-tube complication
  - f. Pyloromyotomy/pyloroplasty complication
  - g. Clostridium infection
  - h. GI bleeding requiring intervention or transfusion
  - i. Delayed conduit emptying requiring intervention or delaying discharge, or requiring nasogastric tube >7 days
  - j. Pancreatitis
  - k. Pancreatic fistula
  - l. Liver dysfunction
  - m. Biliary leakage

FINEGO data form (esophageal and gastric cancer)

4. Urologic
  - a. Acute renal failure (doubling of baseline creatinine)
  - b. Acute renal failure requiring dialysis
  - c. Urinary tract infection
  - d. Urinary retention requiring re-insertion of catheter, delaying discharge, or discharge with catheter
  
5. Thromboembolic
  - a. DVT (ultrasound or angio verified)
  - b. Pulmonary embolism
  - c. Stroke (defined by CT or similar)
  - d. Peripheral thrombophlebitis (clinically verified)
  
6. Neurologic / psychiatric
  - a. Recurrent nerve paresis (mark: A unilateral, B bilateral)
    - i. Type 1: Transient injury, requires no other therapy than dietary modification
    - ii. Type 2: Injury requiring elective surgery (thyroplasty or medialization procedure)
    - iii. Type 3: Injury requiring acute surgery due to aspiration or respiratory issues
  - b. Other neurologic injury
  - c. Acute delirium
  - d. Delirium tremens (alcohol withdrawal symptom)

FINEGO data form (esophageal and gastric cancer)

7. Infection
  - a. Wound infection requiring opening wound or antibiotics
  - b. Central line infection requiring removal or antibiotics
  - c. Intra-abdominal abscess
  - d. Intrathoracic abscess
  - e. Sepsis
  - f. Other infection requiring antibiotics, what .....
  
8. Wound/diaphragm
  - a. Thoracic wound dehiscence
  - b. Acute abdominal wall dehiscence / hernia
  - c. Acute diaphragmatic hernia
  
9. Other
  - a. Chyle leak (Mark: A. <1 liter per day, B >1 liter per day)
    - i. Type 1: requires dietary modifications, but not totally parenteral nutrition
    - ii. Type 2: requires totally parenteral nutrition
    - iii. Type 3: requires surgery or other intervention (chest drains not included)
  - b. Reoperation for reason other than bleeding, anastomotic leak or conduit necrosis,  
reason.....
  - c. Multiple organ failure

FINEGO data form (esophageal and gastric cancer)

**57 Clavien-Dindo classification for complications (only the most severe grade to be ticked)**

0. No complications
1. Grade 1 (Any deviation from postoperative course, including antiemetics, antipyretics, analgetics, diuretics and electrolytes and physiotherapy or opening the wound bedside)\*
2. Grade 2 (Blood transfusion, total parenteral nutrition or pharmacological treatment needed other than I)
3. Grade 3 (Surgical, endoscopic or radiological intervention)
4. Grade 4 (Life-threatening complications requiring IC/ICU-management, or stroke (not TIA) or any brain hemorrhage)
5. Grade 5 (Death of a patient)

**58 REOPERATIONS****Reoperation 1**

Days from primary operation: \_\_\_\_\_

Reason for operation: \_\_\_\_\_

Result: \_\_\_\_\_

**Reoperation 2**

Days from primary operation: \_\_\_\_\_

Reason for operation: \_\_\_\_\_

Result: \_\_\_\_\_

**Reoperation 3**

Days from primary operation: \_\_\_\_\_

Reason for operation: \_\_\_\_\_

Result: \_\_\_\_\_

FINEGO data form (esophageal and gastric cancer)
